# Supplementary material for: Antibacterial Polyketides from the Marine Alga-Derived Endophitic Streptomyces sundarbansensis: A Study on Hydroxypyrone Tautomerism
Source: PubMed Central journal article supplement (PMC3564162; doi:10.3390/md11010124), 2013-01-10
Supplement: marinedrugs-11-00124-s001.pdf [file marinedrugs-11-00124-s001.pdf]

## Supplementary Information

|                                                                                                                                                                            |    |
|----------------------------------------------------------------------------------------------------------------------------------------------------------------------------|----|
| <b>Figure S1.</b> ESI (+) MS (top) and fragmentation MS/MS spectra on $m/z$ 353 $[M + Na]^+$ (bottom) of compound <b>13</b> .                                              | 2  |
| <b>Figure S2.</b> ESI (-) MS (top) and MS/MS spectra on $m/z$ 329 $[M - H]^-$ ( bottom ) of compound <b>13</b> .                                                           | 3  |
| <b>Figure S3.</b> $^1H$ -NMR spectrum of <b>13</b> in $CDCl_3$ .                                                                                                           | 4  |
| <b>Figure S4.</b> $^1H$ -NMR spectrum of <b>13</b> in $CD_3OD$ .                                                                                                           | 5  |
| <b>Figure S5.</b> HSQC spectrum of <b>13</b> in $CD_3OD$ .                                                                                                                 | 6  |
| <b>Figure S6.</b> HMBC spectrum of <b>13</b> in $CD_3OD$ .                                                                                                                 | 7  |
| <b>Figure S7.</b> ESI (+) MS and MS/MS spectra on $m/z$ 358 $[M + Na]^+$ of deuterated <b>13</b> from a $CD_3OD$ solution.                                                 | 8  |
| <b>Figure S8.</b> ESI (-) MS and MS/MS spectra on $m/z$ 332 $[M - H]^-$ of deuterated <b>13</b> from a $CD_3OD$ solution.                                                  | 9  |
| <b>Figure S9.</b> $^1H$ -NMR spectrum of <b>7</b> in acetone- $d_6$ .                                                                                                      | 10 |
| <b>Figure S10.</b> $^1H$ -NMR spectrum of <b>9</b> in acetone- $d_6$ .                                                                                                     | 11 |
| <b>Figure S11.</b> $^1H$ -NMR spectrum of <b>11</b> in $CD_3OD$ .                                                                                                          | 12 |
| <b>Figure S12.</b> DFT calculated IR spectra of 4-hydroxy $\alpha$ -pyrone form ( <b>A</b> ) and 2-hydroxy $\gamma$ -pyrone form; ( <b>B</b> ) of the compound <b>7</b> .  | 13 |
| <b>Figure S13.</b> Experimental FT-IR spectrum of compound <b>7</b> .                                                                                                      | 14 |
| <b>Figure S14.</b> DFT calculated IR spectra of 4-hydroxyl $\alpha$ -pyrone form ( <b>A</b> ) and 2-hydroxy $\gamma$ -pyrone form ( <b>B</b> ) of the compound <b>9</b> .  | 15 |
| <b>Figure S15.</b> Experimental FT-IR spectrum of compound <b>9</b> .                                                                                                      | 16 |
| <b>Figure S16.</b> DFT calculated IR spectra of 4-hydroxyl $\alpha$ -pyrone form ( <b>A</b> ) and 2-hydroxy $\gamma$ -pyrone form ( <b>B</b> ) of the compound <b>13</b> . | 17 |
| <b>Figure S17.</b> Experimental FT-IR spectrum of compound <b>13</b> .                                                                                                     | 18 |
| <b>Table S1.</b> Antibacterial activities at 100 $\mu$ L/well of compounds <b>9</b> , <b>11</b> and <b>13</b> .                                                            | 18 |

**Figure S1.** ESI (+) MS (top) and fragmentation MS/MS spectra on  $m/z$  353  $[M + Na]^+$  (bottom) of compound **13**.

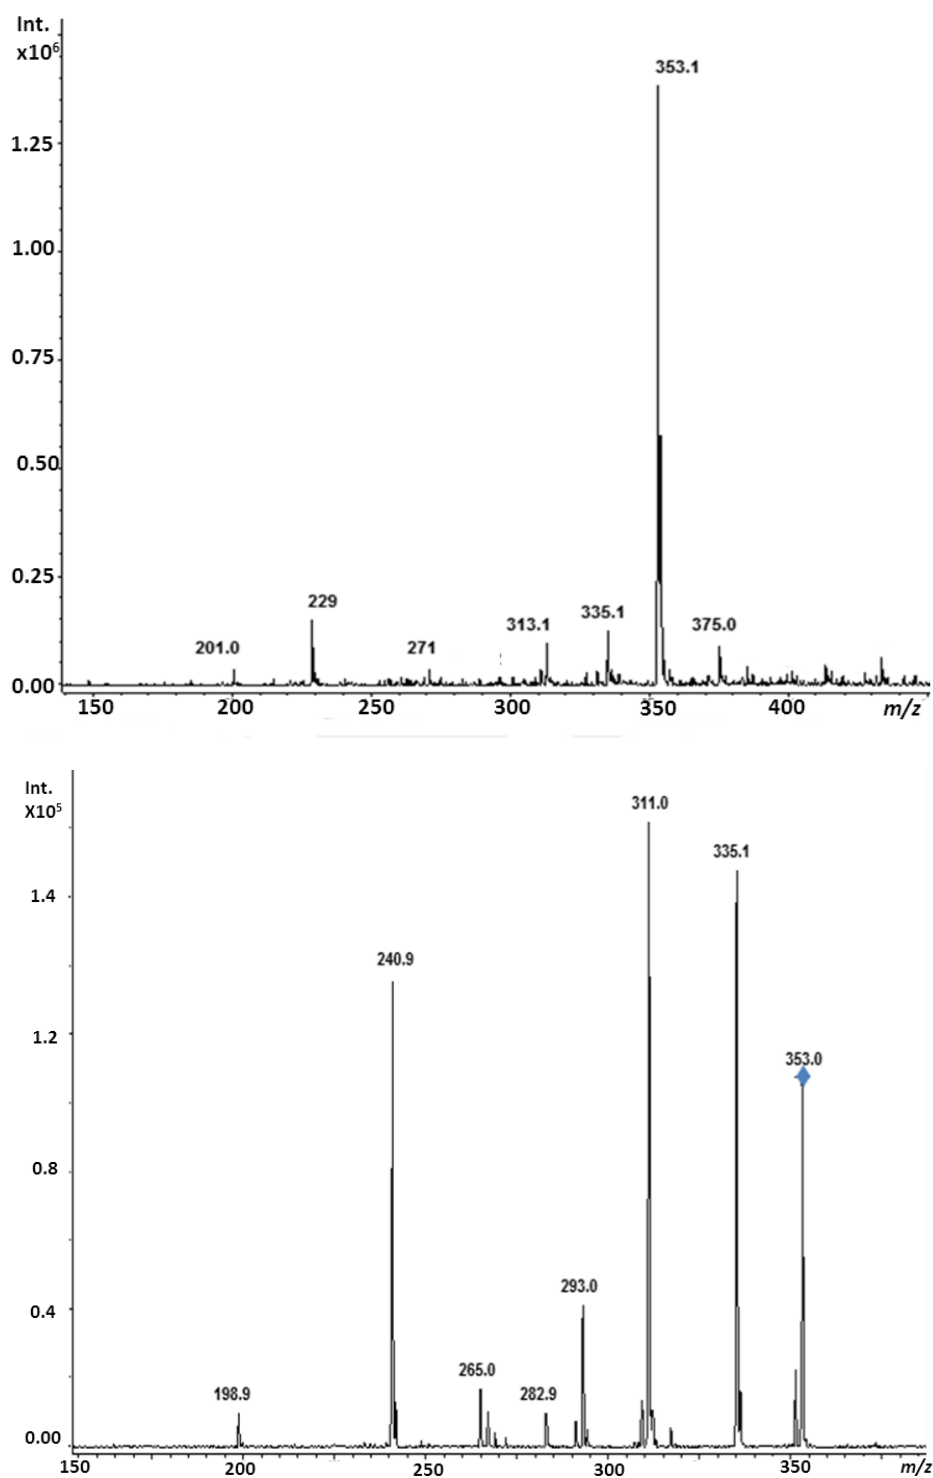

**Figure S2.** ESI (-) MS (top) and MS/MS spectra on  $m/z$  329  $[M - H]^-$  (bottom) of compound **13**.

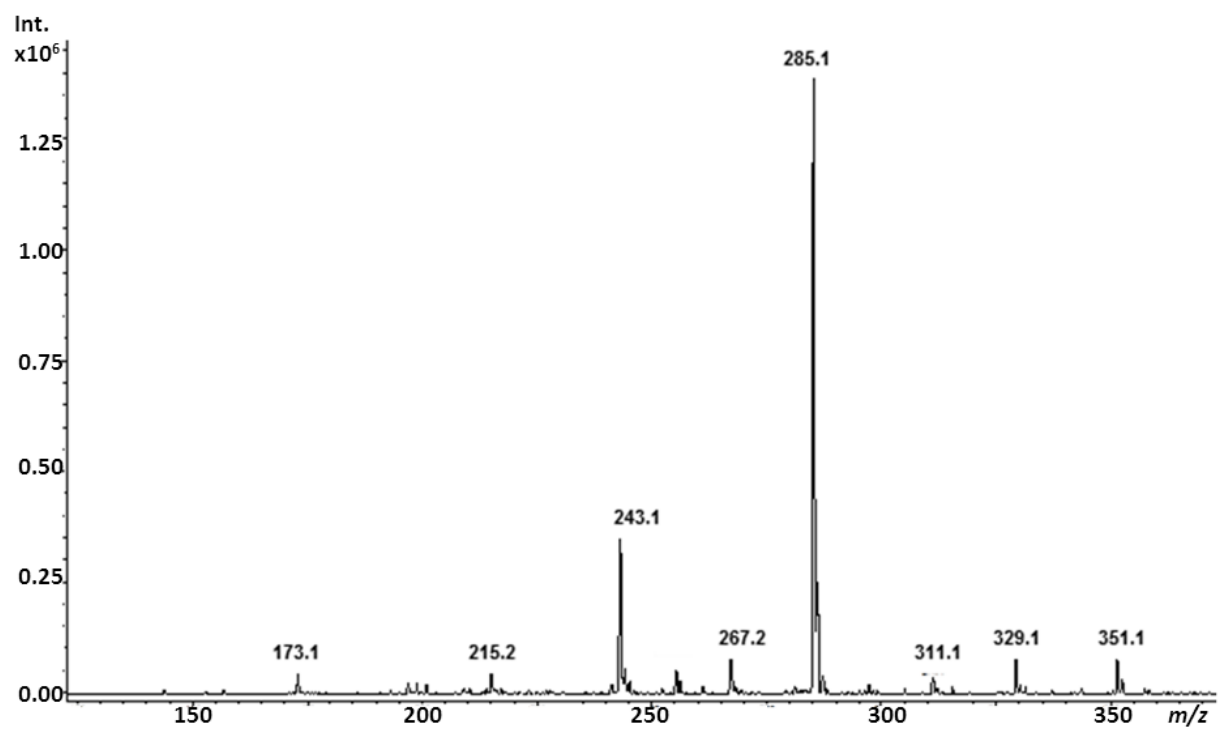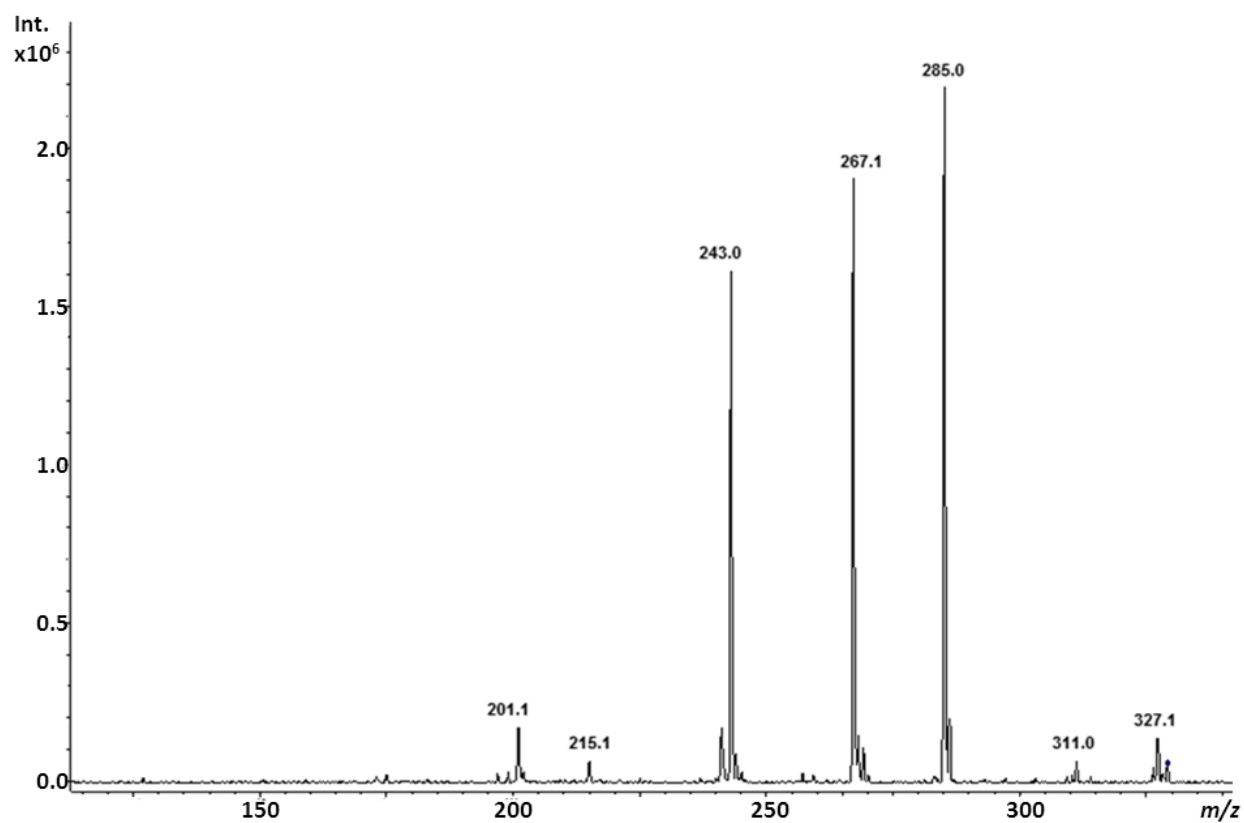

Figure S3.  $^1\text{H-NMR}$  spectrum of **13** (400 MHz, in  $\text{CDCl}_3$ ).

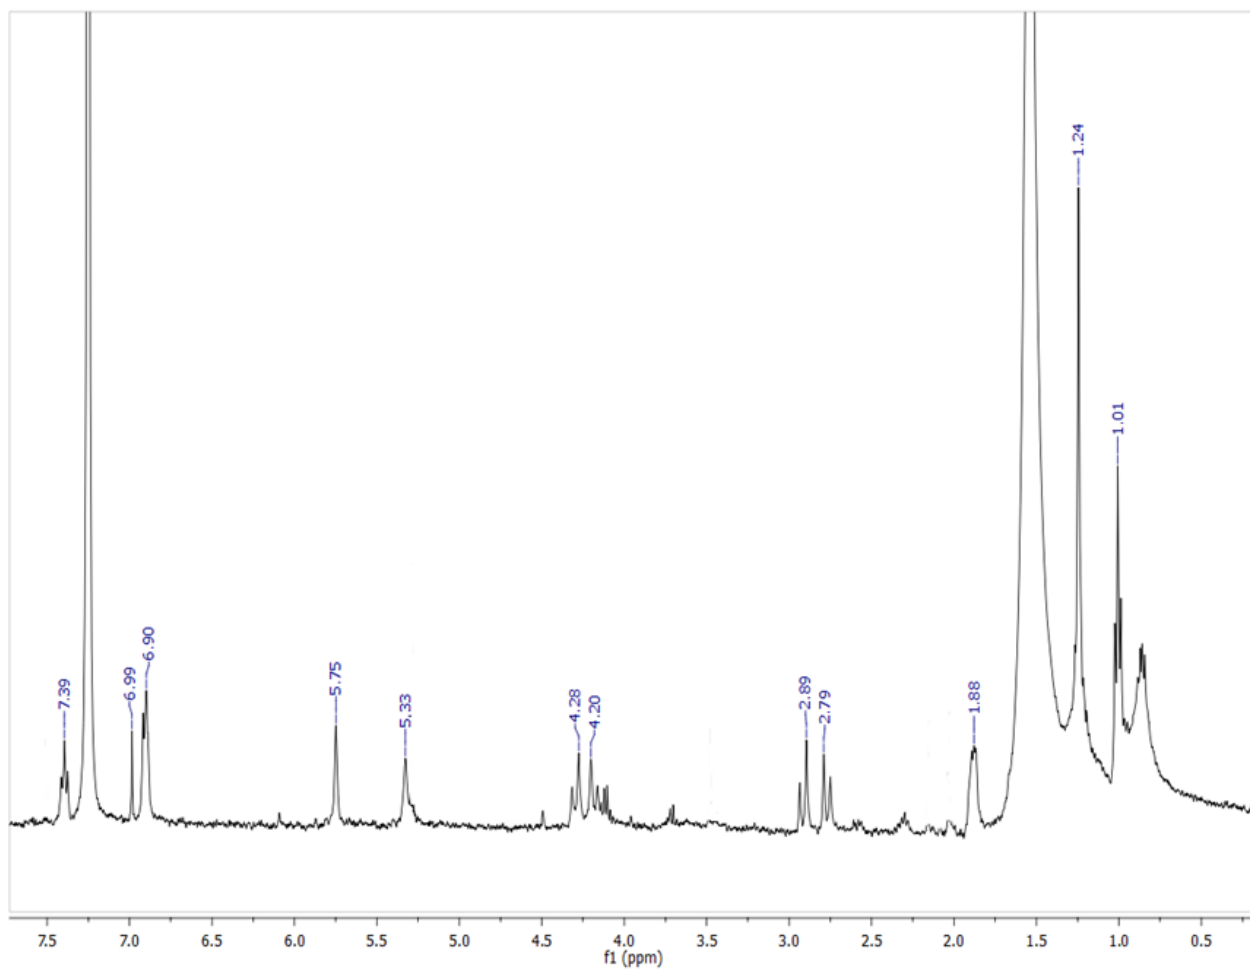

**Figure S4.**  $^1\text{H}$ -NMR spectrum of **13** (400 MHz, in  $\text{CD}_3\text{OD}$ ).

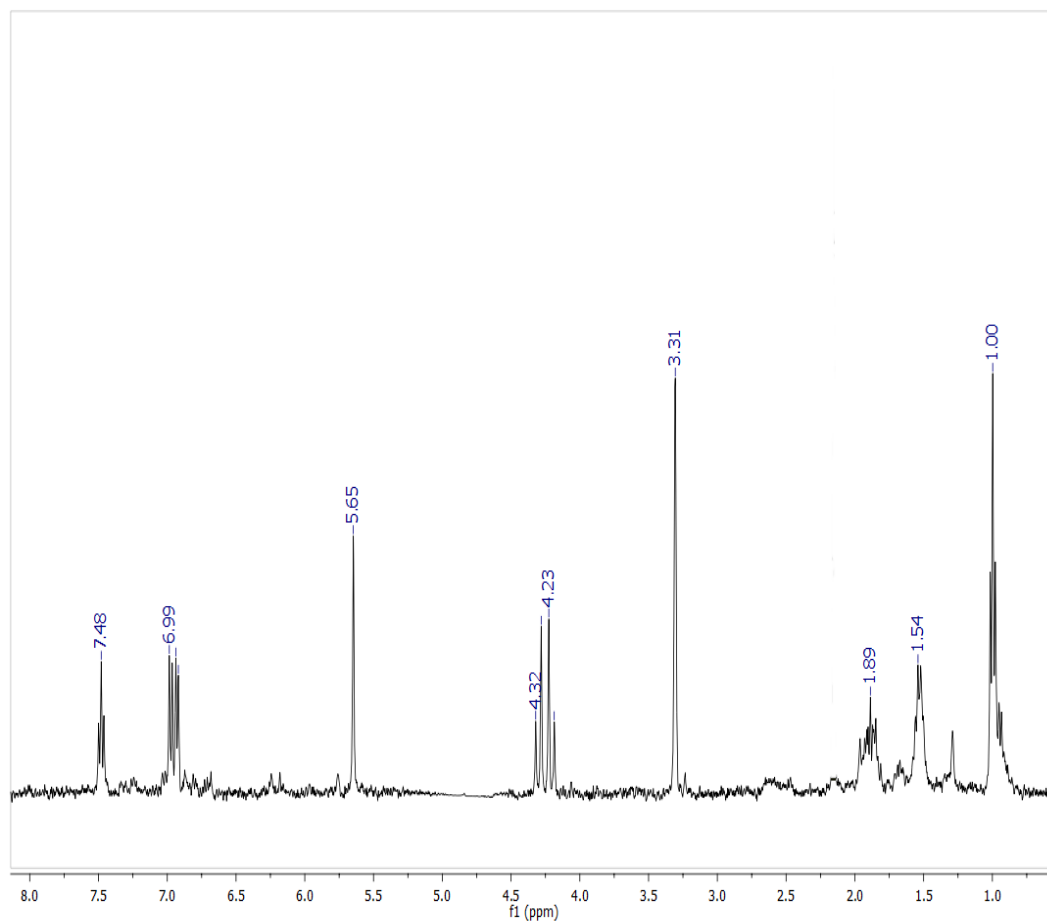

Figure S5. HSQC spectrum of 13 in CD<sub>3</sub>OD.

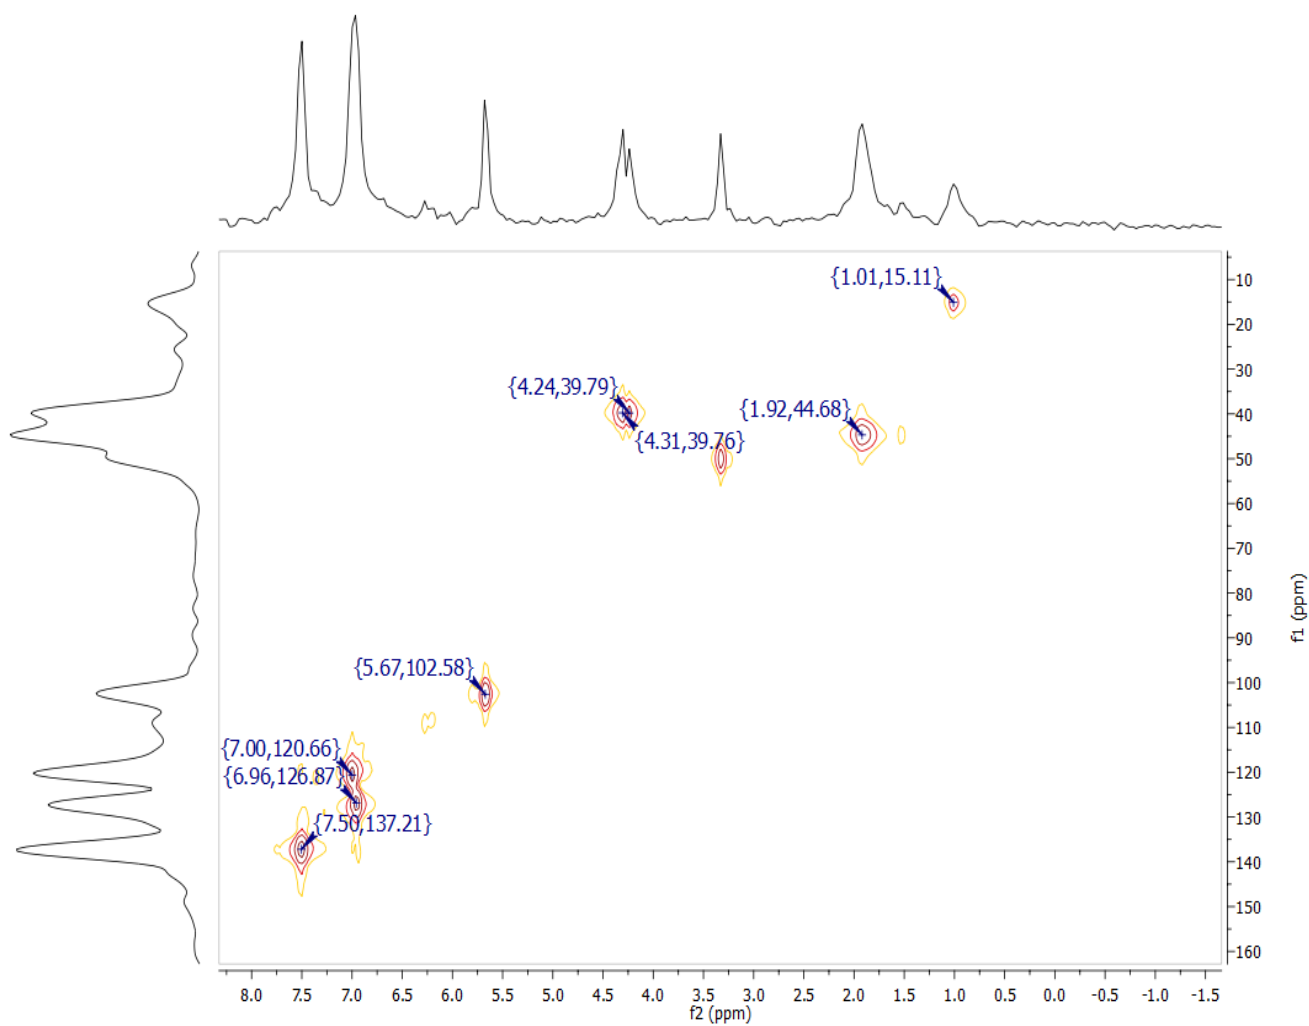

Figure S6. HMBC spectrum of **13** in CD<sub>3</sub>OD.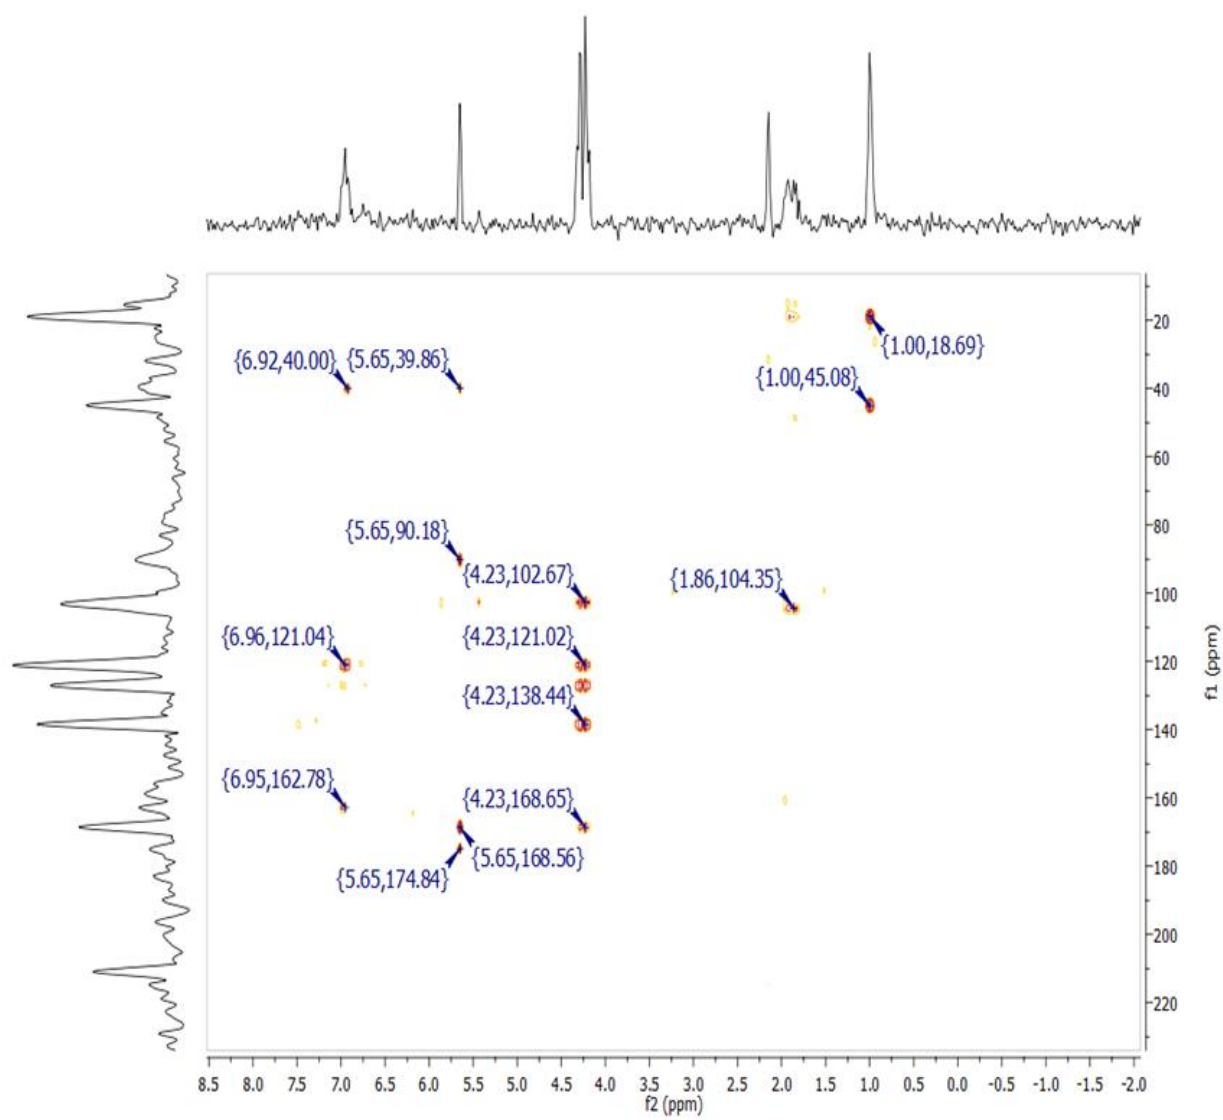

**Figure S7.** ESI (+) MS and MS/MS spectra on  $m/z$  358  $[M + Na]^+$  of deuterated **13** from a  $CD_3OD$  solution.

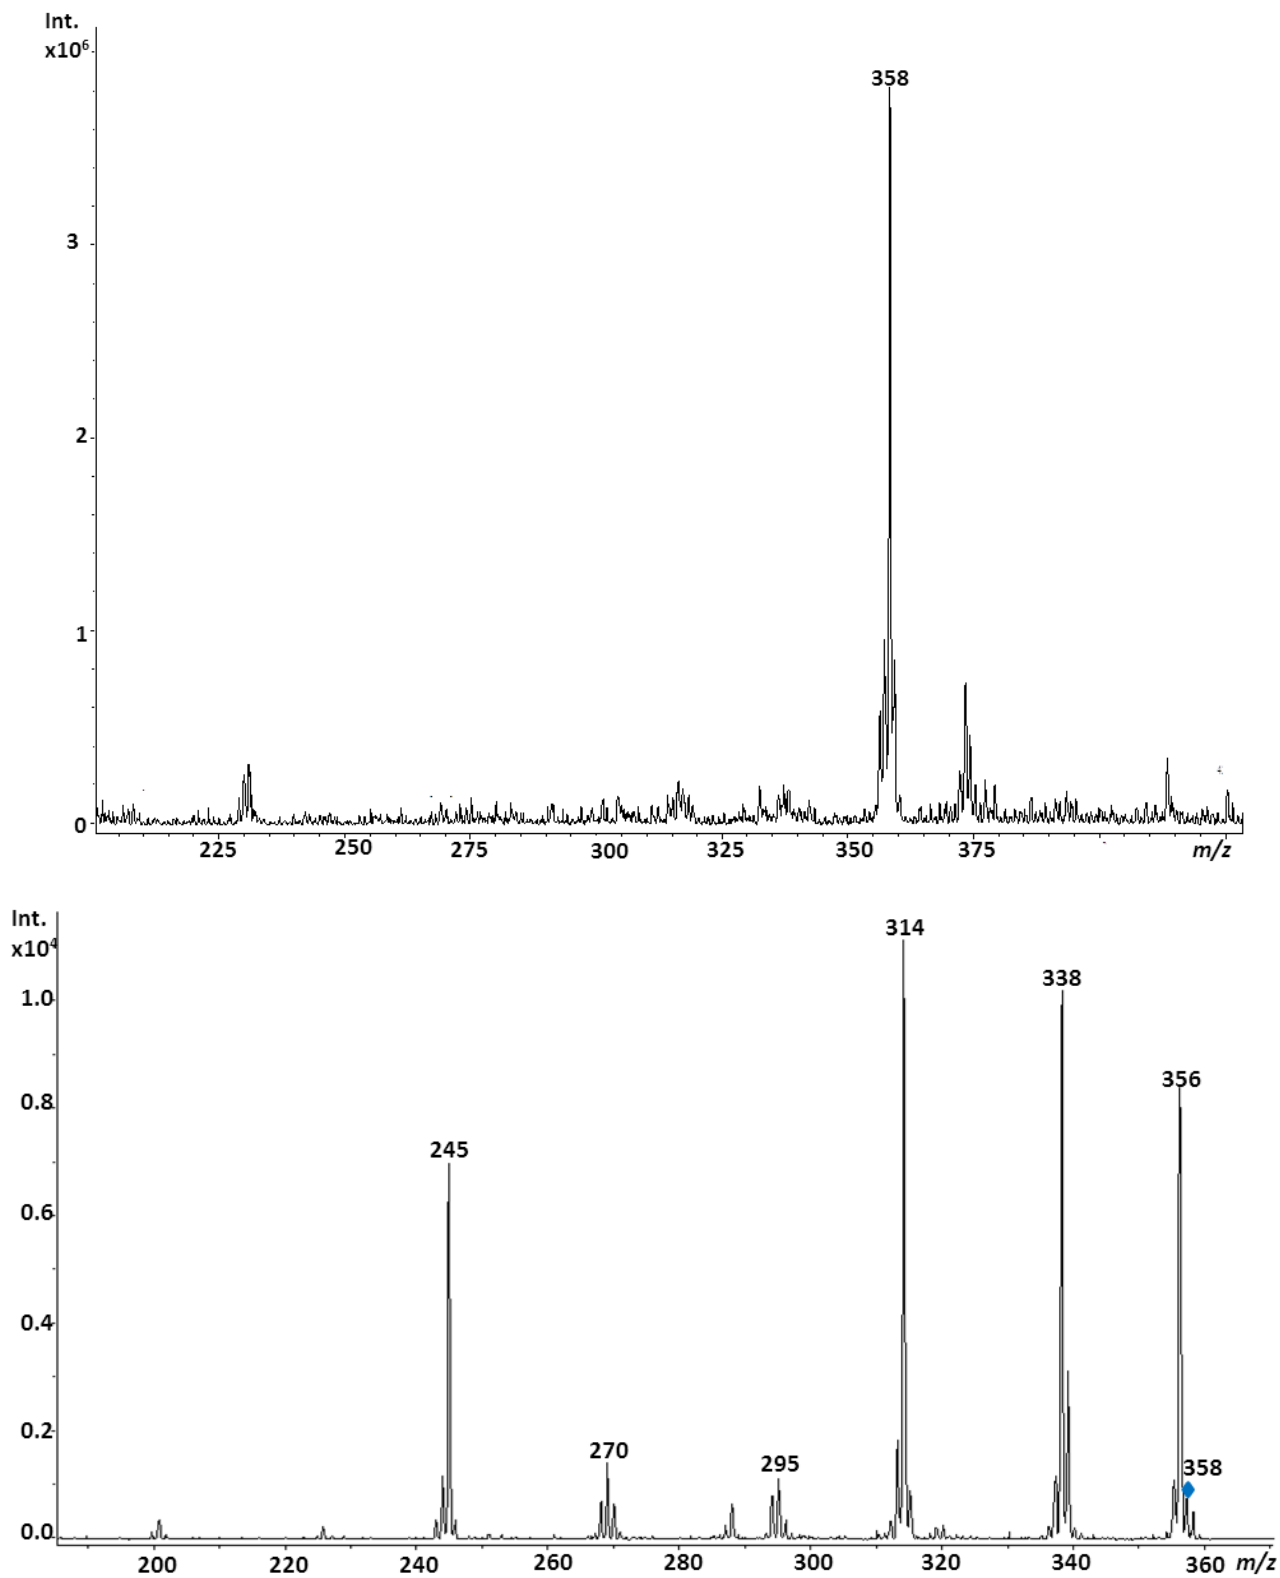



**Figure S8.** ESI (-) MS and MS/MS spectra on  $m/z$  332  $[M - H]^-$  of deuterated **13** from a  $CD_3OD$  solution.

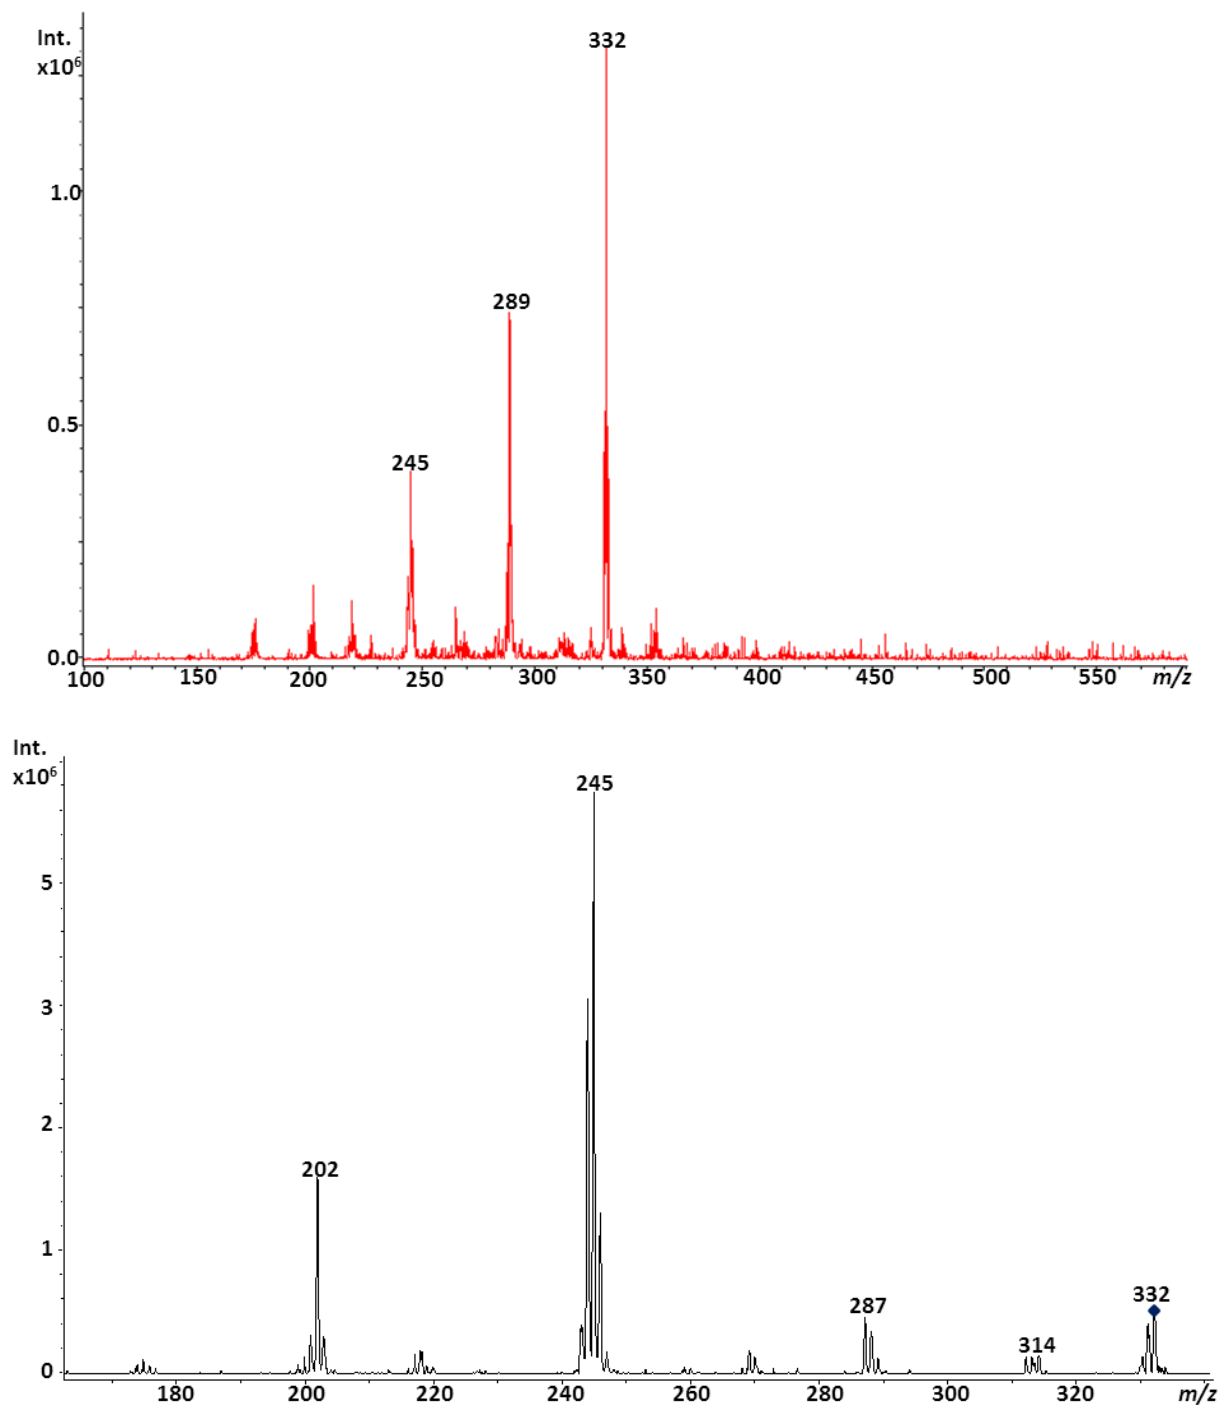

**Figure S9.**  $^1\text{H}$ -NMR spectrum of **7** (400 MHz, in acetone- $d_6$ ).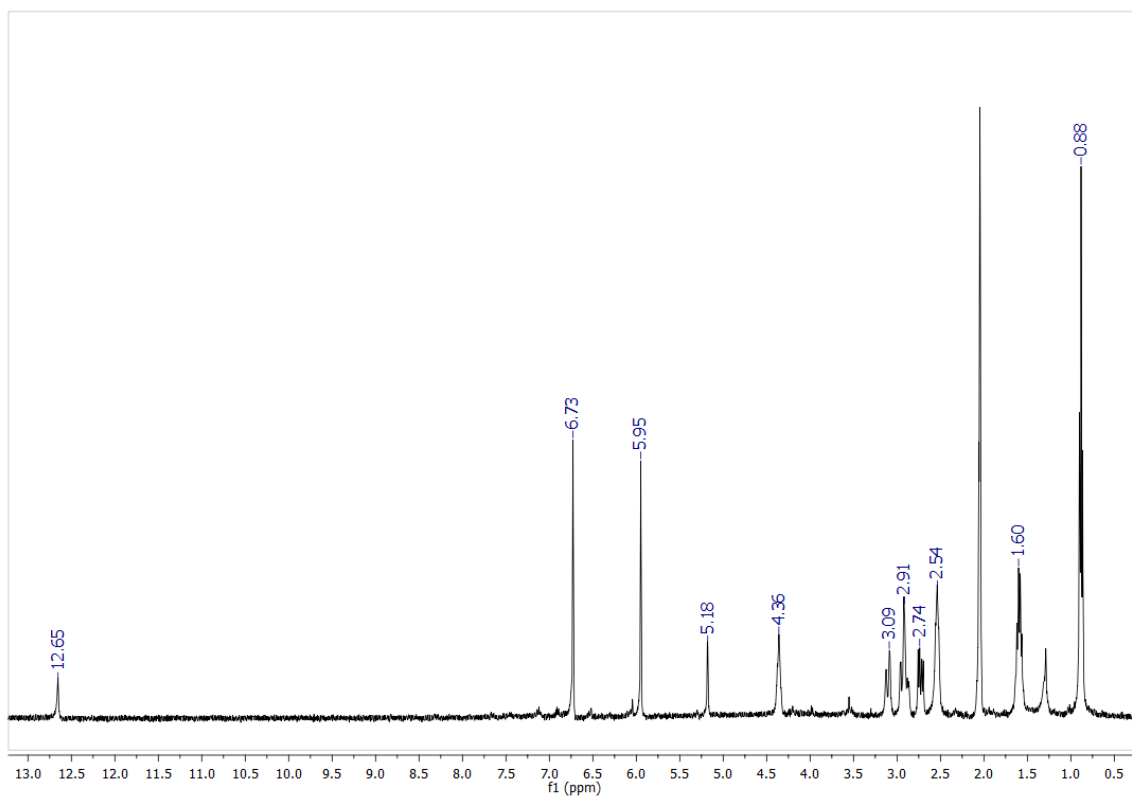

**Figure S10.**  $^1\text{H}$ -NMR spectrum of **9** (400 MHz, in acetone- $d_6$ ).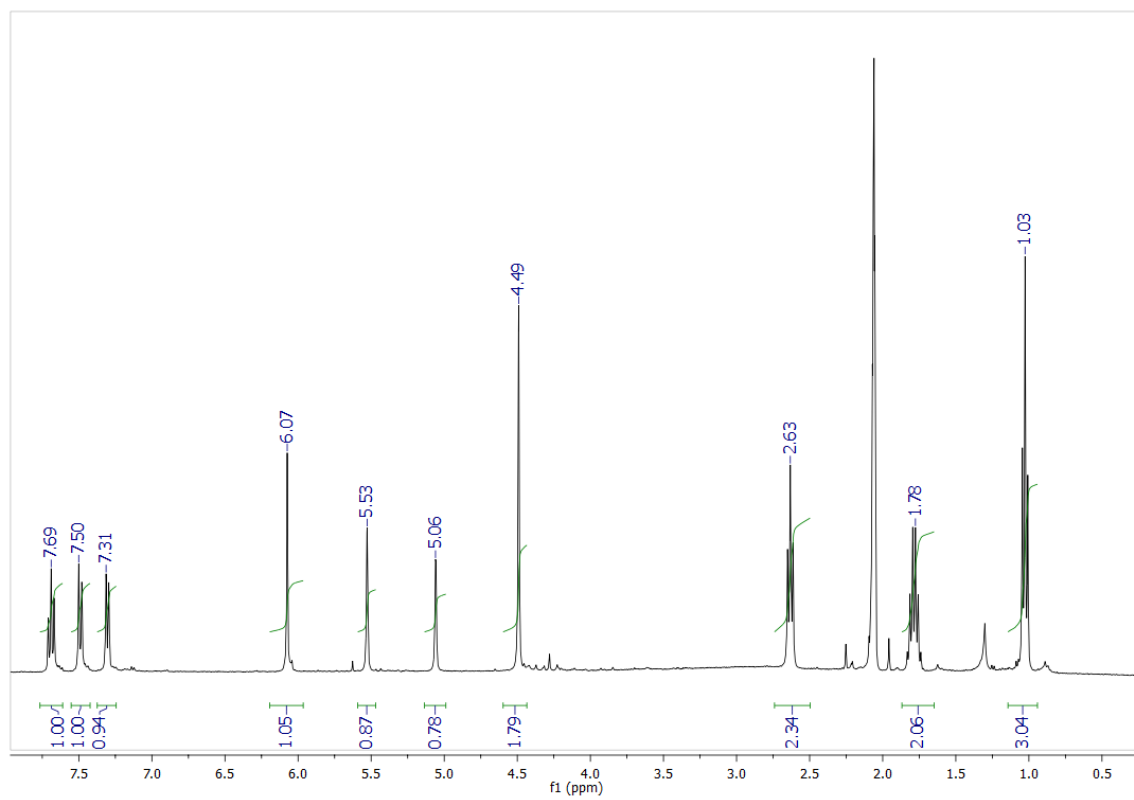

Figure S11.  $^1\text{H}$ -NMR spectrum of **11** (400 MHz, in  $\text{CD}_3\text{OD}$ ).

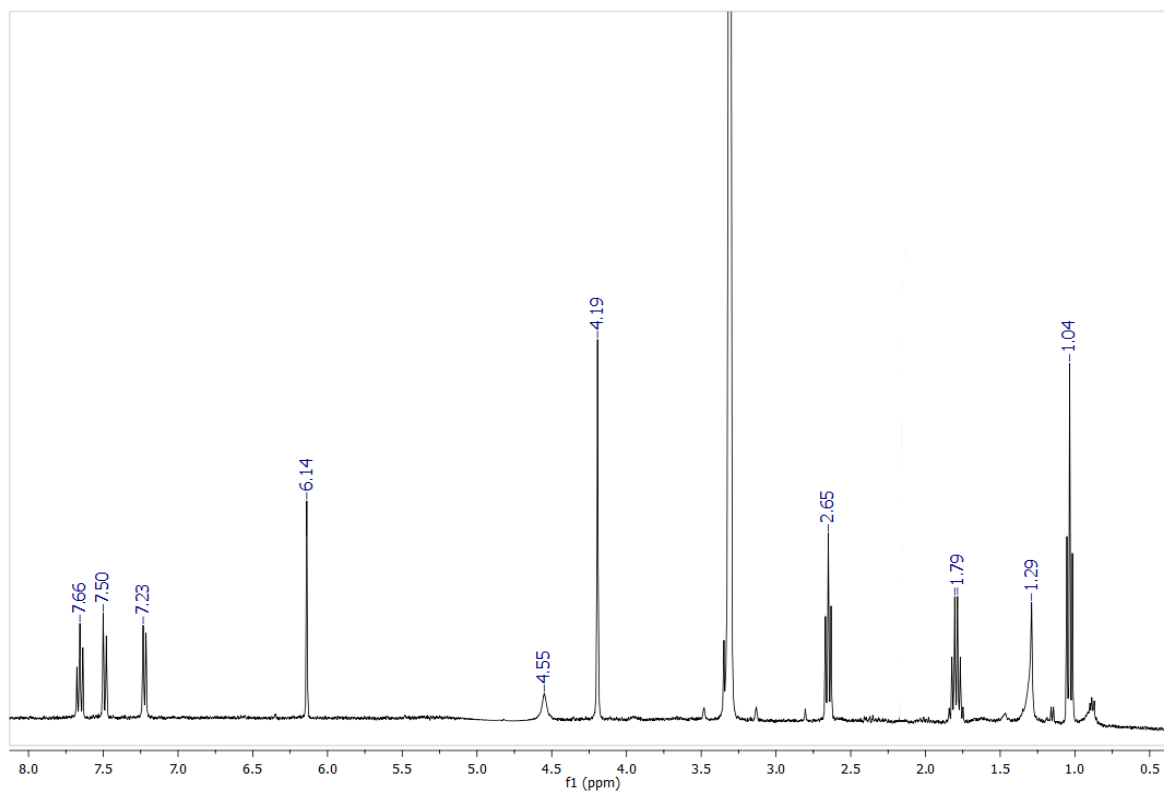

**Figure S12.** DFTcalculated IR spectra of 4-hydroxy  $\alpha$ -pyrone form (A) and 2-hydroxy  $\gamma$ -pyroneform (B) of the compound 7.

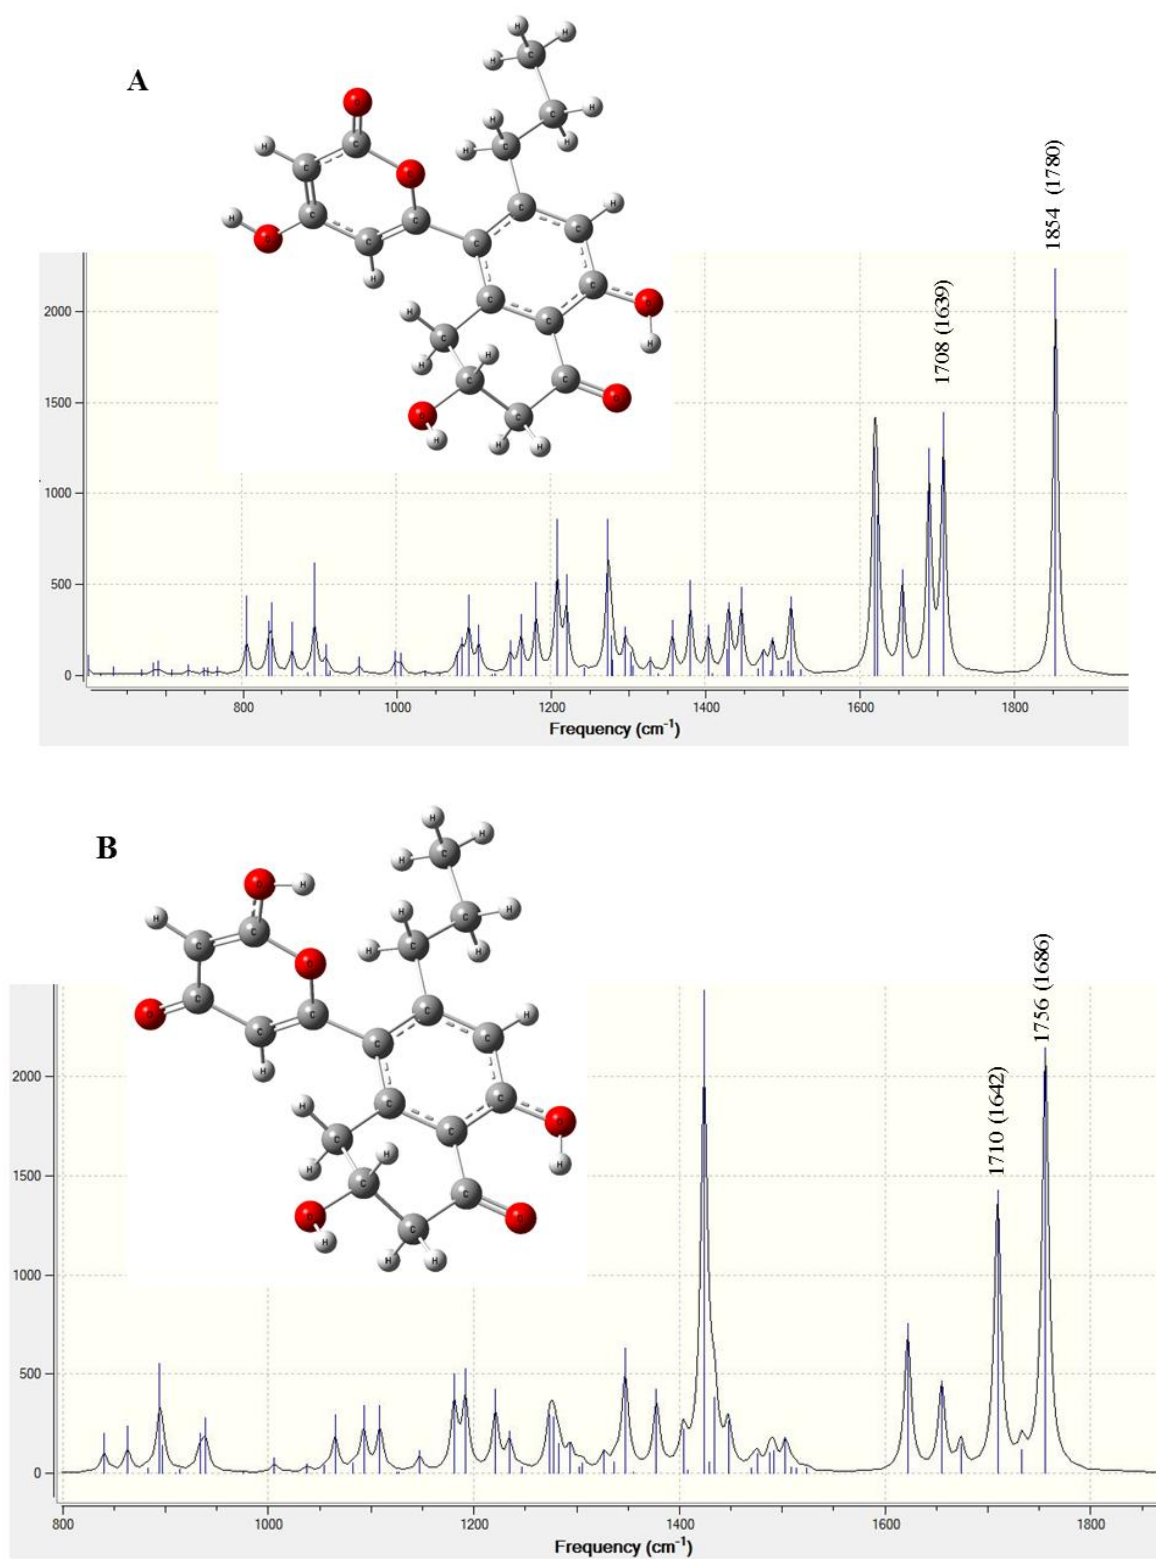

**Figure S13.** Experimental FT-IR spectrum of compound 7.

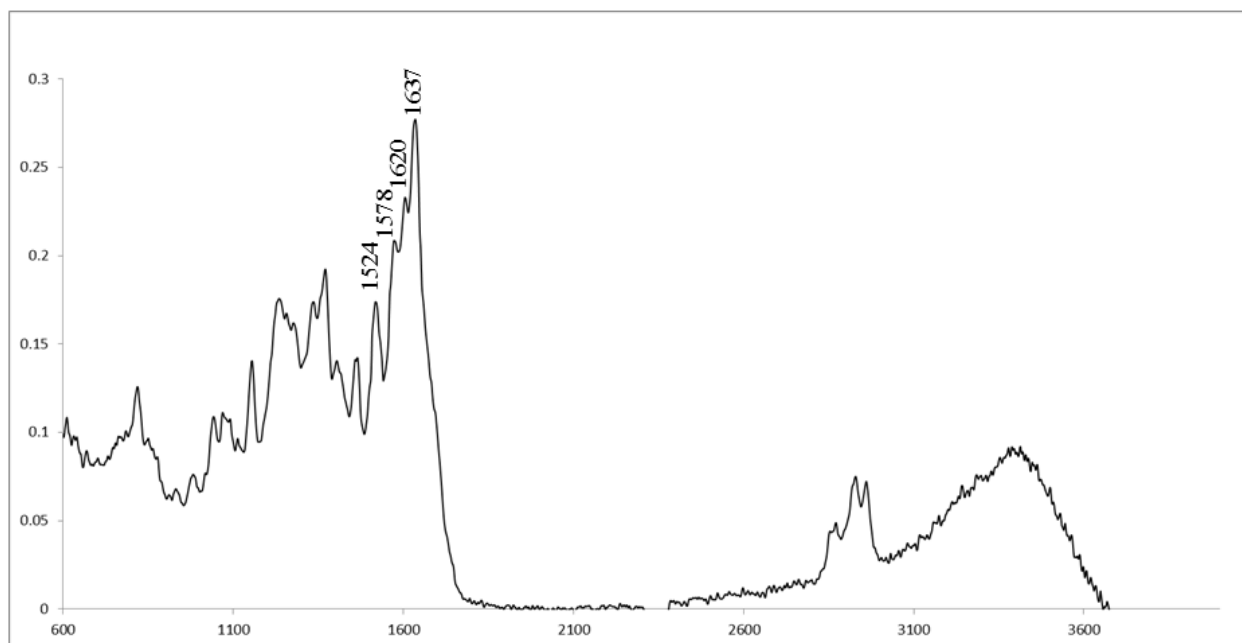

**Figure S14.** DFT calculated IR spectra of the compound **9** in 4-hydroxy  $\alpha$ -pyrone form (A) and 2-hydroxy  $\gamma$ -pyroneform (B).

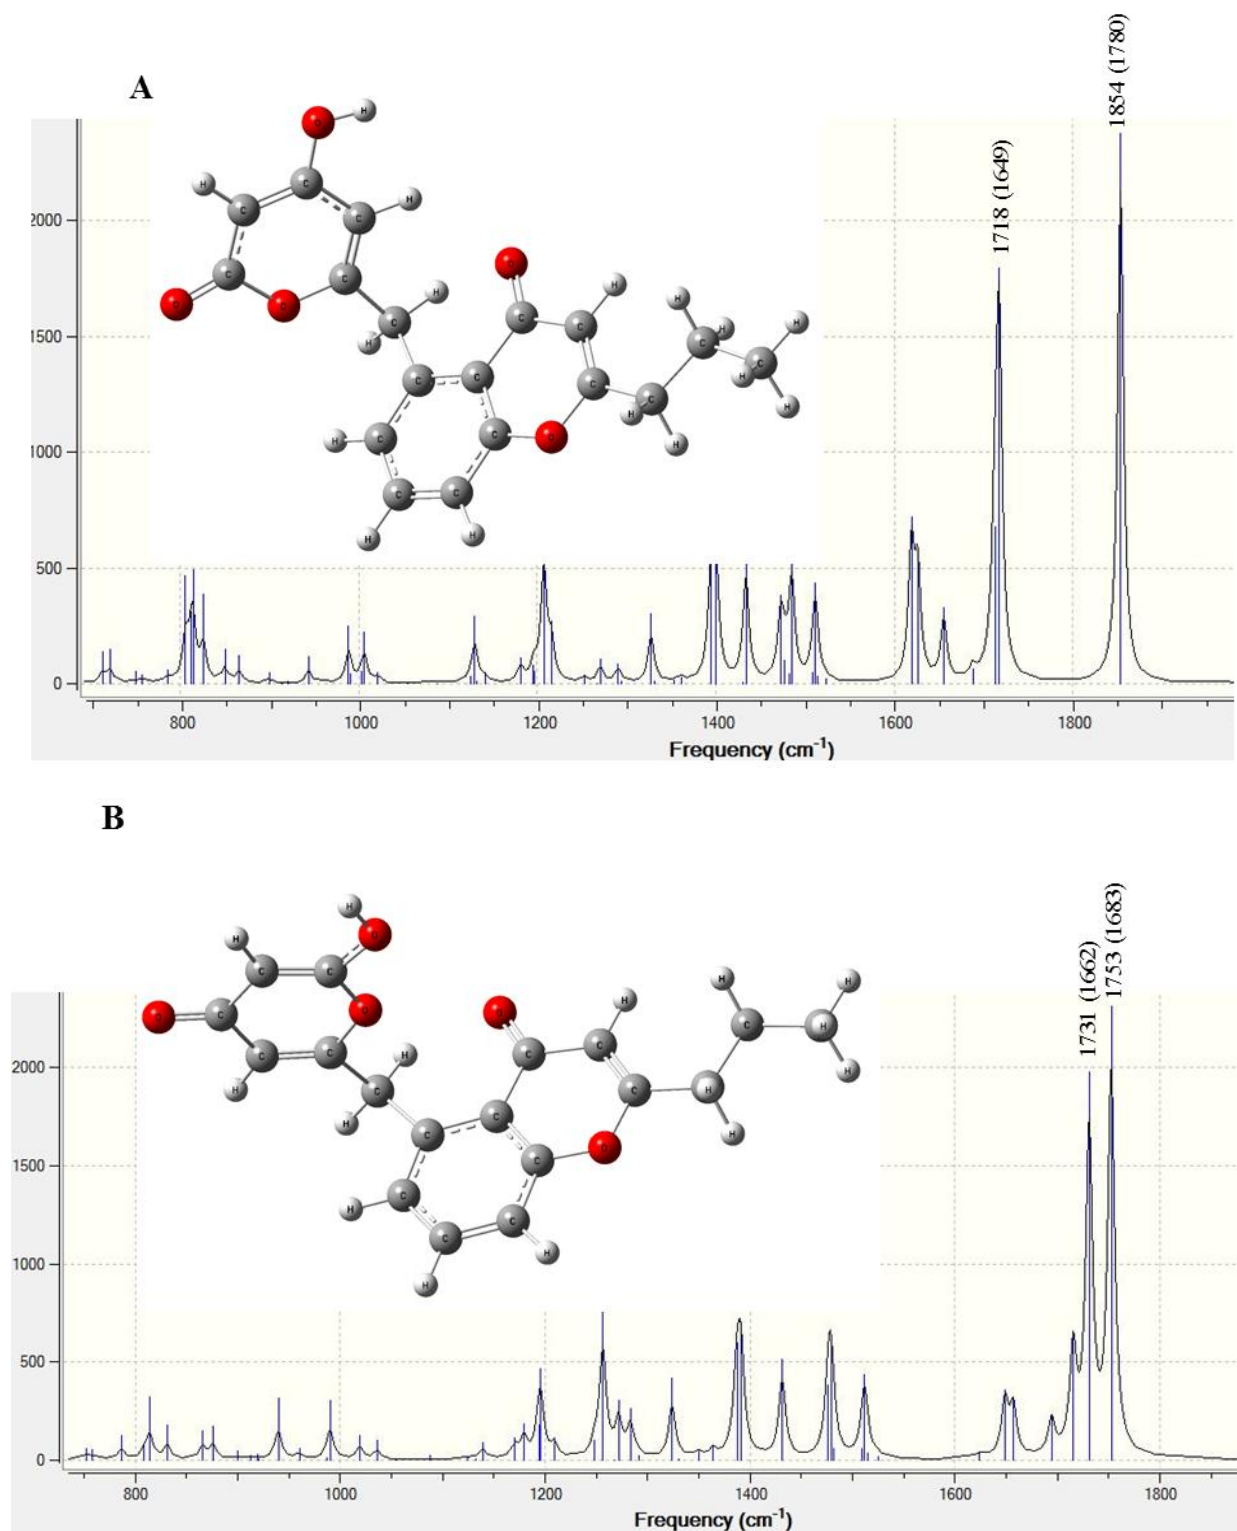

Figure S15. Experimental FT-IR spectrum of compound 9.

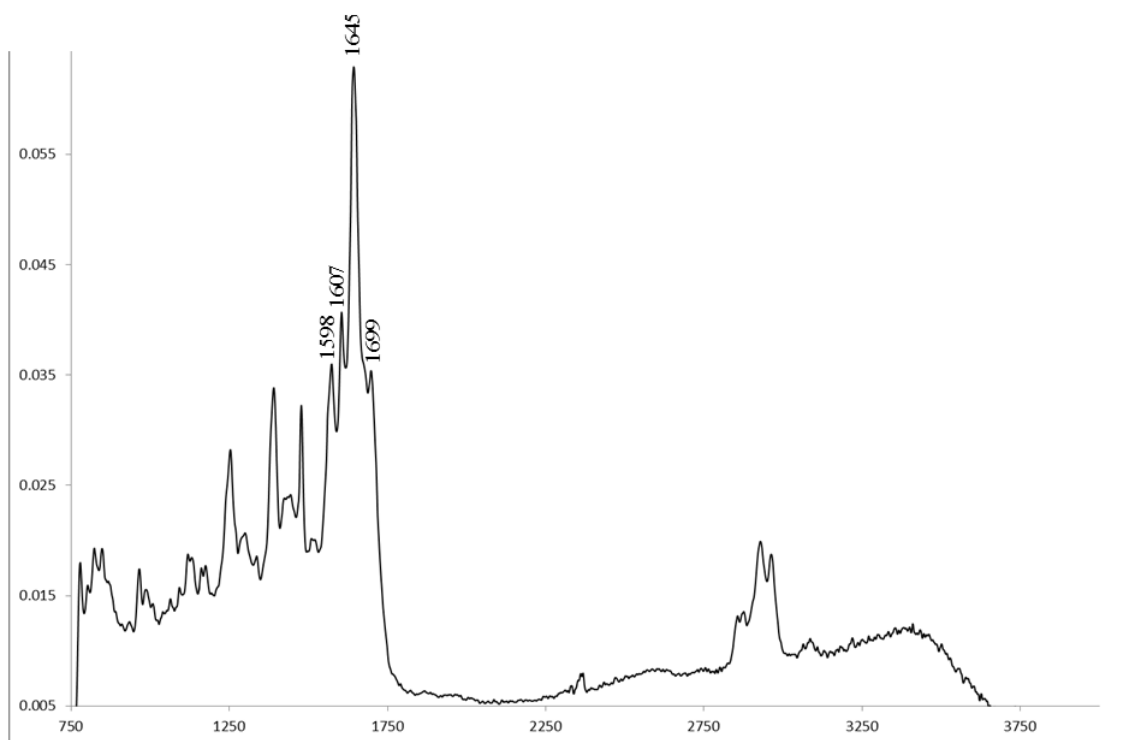



**Figure S16.** DFT calculated IR spectra of the compound **13** in 4-hydroxy  $\alpha$ -pyrone form (A) and 2-hydroxy  $\gamma$ -pyrone form (B).

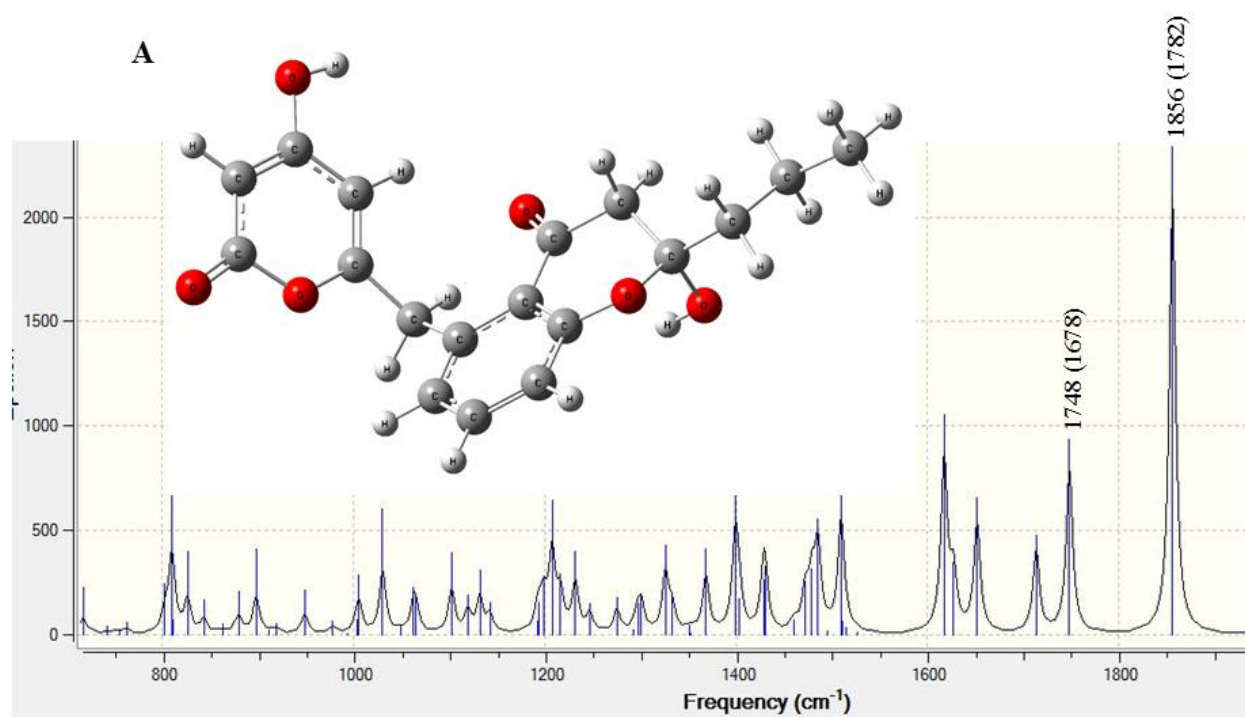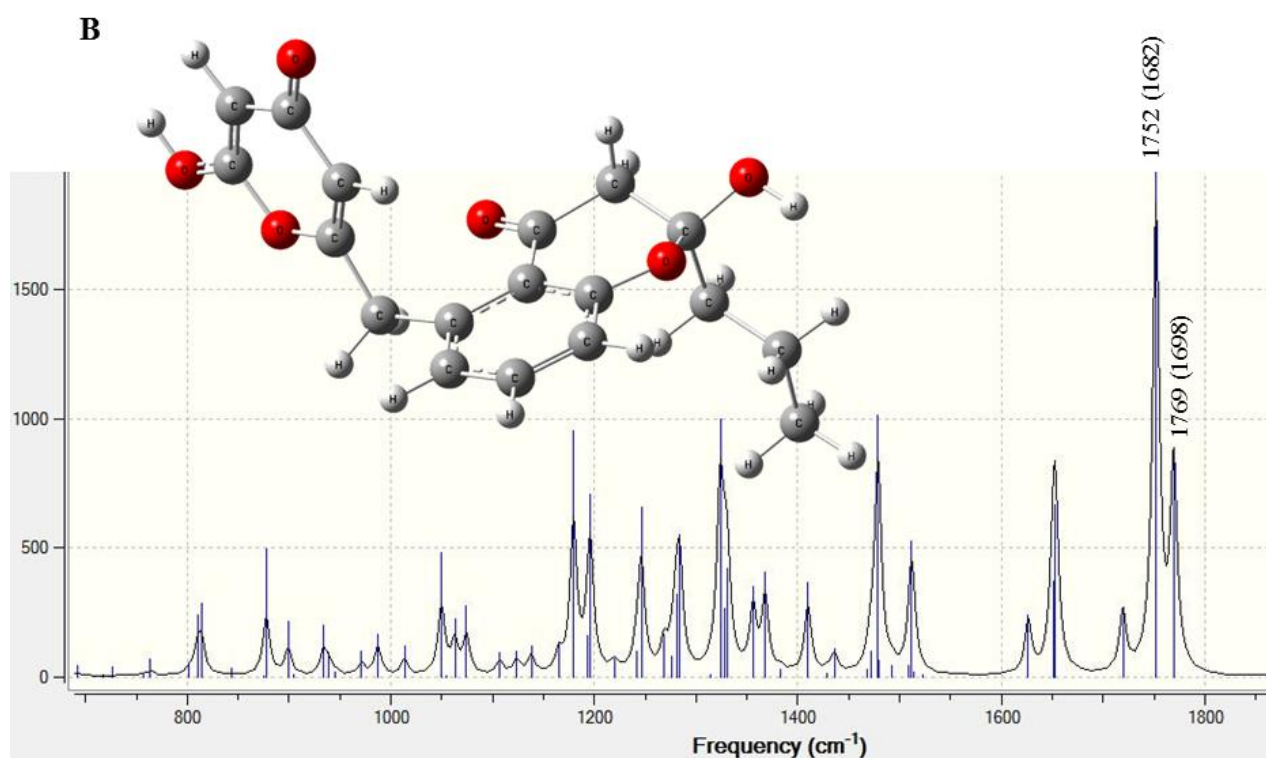

**Figure S17.** Experimental FT-IR spectrum of compound **13**.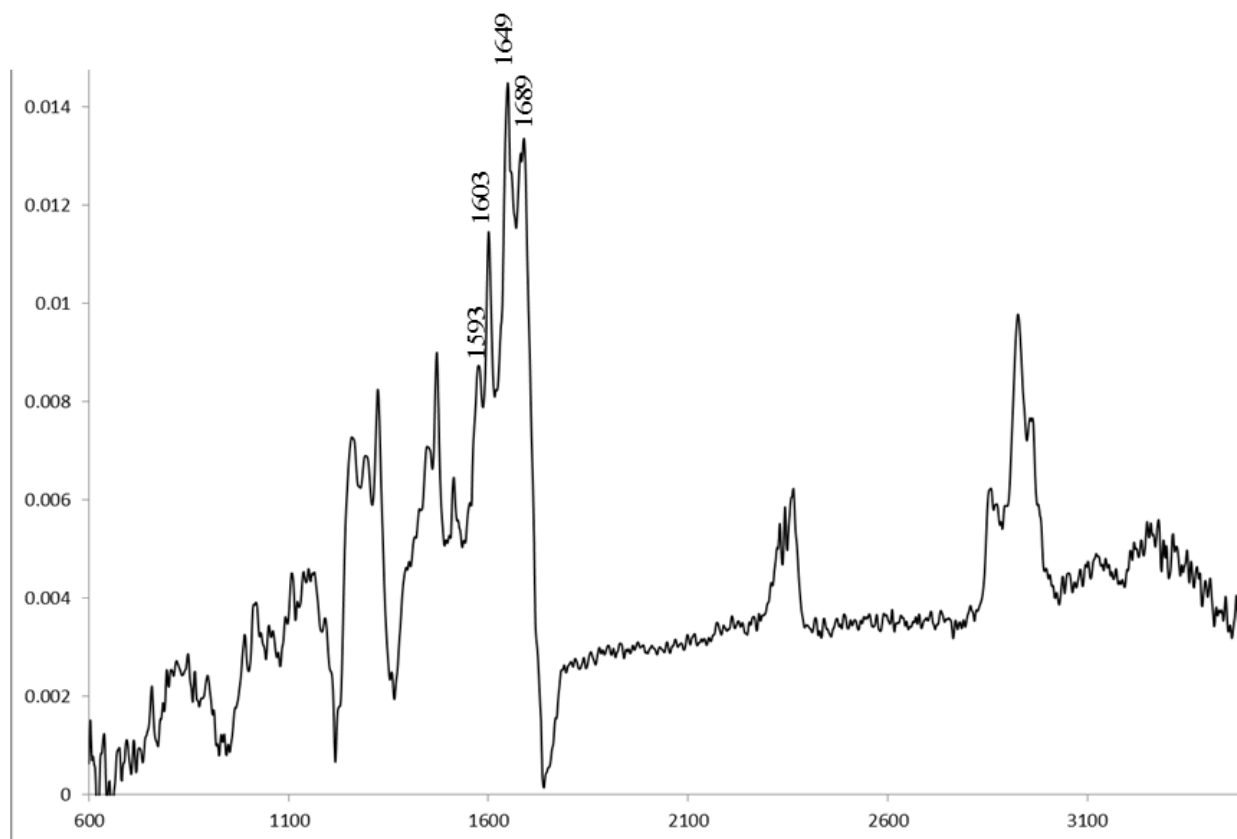**Table S1.** Antibacterial activities at 100  $\mu$ L/well of compounds **9**, **11** and **13**.

| Compounds                     | Inhibition Zone $\pm$ SD (mm) |                             |                        |                              |                                 |
|-------------------------------|-------------------------------|-----------------------------|------------------------|------------------------------|---------------------------------|
|                               | <i>E. coli</i> ATCC 25922     | <i>S. aureus</i> ATCC 25923 | <i>MRSA</i> ATCC 43300 | <i>B. subtilis</i> ATCC 6633 | <i>P. aeruginosa</i> ATCC 27853 |
| <b>9</b>                      | -                             | -                           | 08.34 $\pm$ 1.04       | -                            | 11.07 $\pm$ 1.23                |
| <b>11</b>                     | 08.08 $\pm$ 0.41              | -                           | 08.27 $\pm$ 0.38       | -                            | 07.61 $\pm$ 0.71                |
| <b>13</b>                     | 12.44 $\pm$ 0.84              | -                           | 15.033 $\pm$ 0.57      | -                            | 13.56 $\pm$ 0.84                |
| Vancomycin (30 $\mu$ g/disc)  | ND                            | 20.05 $\pm$ 0.60            | ND                     | ND                           | ND                              |
| Erythromycin(15 $\mu$ g/disc) | ND                            | 25.26 $\pm$ 0.64            | 14.63 $\pm$ 0.27       | ND                           | ND                              |
| Gentamicin (10 $\mu$ g/disc)  | 23.37 $\pm$ 0.5               | 25.78 $\pm$ 0.30            | ND                     | ND                           | 18.88 $\pm$ 0.27                |

-: No activity observed; ND: not determined.
