# Supplementary material for: Antibacterial Polyketides from the Marine Alga-Derived Endophitic Streptomyces sundarbansensis: A Study on Hydroxypyrone Tautomerism
Source: MDPI journal article supplement (doi:10.3390/md11010124), 2013-01-10
Supplement: s2 [file s2]

marinedrugs-11-00124-s001.mol
  corina  07071423063D 1   1.00000     0.00000 
CORINA 3.49 0023  12.04.2013
 22 24  0  0  0  0  0  0  0  0999 V2000
   -0.0163    1.3541    0.0095 C   0  0  0  0  0  0  0  0  0  0  0  0
    0.0021   -0.0041    0.0020 C   0  0  0  0  0  0  0  0  0  0  0  0
    1.1620   -0.6772   -0.0122 O   0  0  0  0  0  0  0  0  0  0  0  0
    2.3486   -0.0447   -0.0201 C   0  0  0  0  0  0  0  0  0  0  0  0
    2.4128    1.3141   -0.0134 C   0  0  0  0  0  0  0  0  0  0  0  0
    1.2083    2.0590    0.0016 C   0  0  0  0  0  0  0  0  0  0  0  0
    3.0974   -1.5227    2.3160 C   0  0  0  0  0  0  0  0  0  0  0  0
    3.9734   -1.5615    1.0940 C   0  0  0  0  0  0  0  0  0  0  0  0
    3.5964   -0.8343   -0.0358 C   0  0  0  0  0  0  0  0  0  0  0  0
    5.1522   -2.3052    1.0621 C   0  0  0  0  0  0  0  0  0  0  0  0
    5.9510   -2.3133   -0.0941 C   0  0  0  0  0  0  0  0  0  0  0  0
    5.5619   -1.5833   -1.2100 C   0  0  0  0  0  0  0  0  0  0  0  0
    4.3963   -0.8511   -1.1831 C   0  0  0  0  0  0  0  0  0  0  0  0
    3.3301   -2.7432    3.2026 C   0  0  0  0  0  0  0  0  0  0  0  0
    4.8235   -2.8509    3.5378 C   0  0  0  0  0  0  0  0  0  0  0  0
    5.5629   -3.0908    2.2378 C   0  0  0  0  0  0  0  0  0  0  0  0
    3.9789   -0.0635   -2.3982 C   0  0  0  0  0  0  0  0  0  0  0  0
    2.5791   -2.6052    4.4104 O   0  0  0  0  0  0  0  0  0  0  0  0
    7.0994   -3.0320   -0.1202 O   0  0  0  0  0  0  0  0  0  0  0  0
   -1.1641   -0.6863    0.0095 O   0  0  0  0  0  0  0  0  0  0  0  0
    1.2276    3.2815    0.0080 O   0  0  0  0  0  0  0  0  0  0  0  0
    6.4617   -3.9022    2.1676 O   0  0  0  0  0  0  0  0  0  0  0  0
  1  2  2  0      
  2  3  1  0      
  3  4  1  0      
  4  5  2  0      
  5  6  1  0      
  6  1  1  0      
  7  8  1  0      
  8  9  2  0      
  9  4  1  0      
  8 10  1  0      
 10 11  2  0      
 11 12  1  0      
 12 13  2  0      
 13  9  1  0      
  7 14  1  0      
 14 15  1  0      
 15 16  1  0      
 16 10  1  0      
 13 17  1  0      
 14 18  1  0      
 11 19  1  0      
  2 20  1  0      
  6 21  2  0      
 16 22  2  0      
M  END
$$$$
