# Supplementary material for: Antibacterial Polyketides from the Marine Alga-Derived Endophitic Streptomyces sundarbansensis: A Study on Hydroxypyrone Tautomerism
Source: MDPI journal article supplement (doi:10.3390/md11010124), 2013-01-10
Supplement: s3 [file s3]

marinedrugs-11-00124-s001.mol
  ChemDraw06021422262D

 22 24  0  0  0  0  0  0  0  0999 V2000
   -1.7862    1.2375    0.0000 C   0  0  0  0  0  0  0  0  0  0  0  0
   -1.7862    0.4125    0.0000 C   0  0  0  0  0  0  0  0  0  0  0  0
   -1.0717   -0.0000    0.0000 O   0  0  0  0  0  0  0  0  0  0  0  0
   -0.3572    0.4125    0.0000 C   0  0  0  0  0  0  0  0  0  0  0  0
   -0.3572    1.2375    0.0000 C   0  0  0  0  0  0  0  0  0  0  0  0
   -1.0717    1.6500    0.0000 C   0  0  0  0  0  0  0  0  0  0  0  0
   -0.3572   -1.2375    0.0000 C   0  0  0  0  0  0  0  0  0  0  0  0
    0.3572   -0.8250    0.0000 C   0  0  0  0  0  0  0  0  0  0  0  0
    0.3572   -0.0000    0.0000 C   0  0  0  0  0  0  0  0  0  0  0  0
    1.0717   -1.2375    0.0000 C   0  0  0  0  0  0  0  0  0  0  0  0
    1.7862   -0.8250    0.0000 C   0  0  0  0  0  0  0  0  0  0  0  0
    1.7862   -0.0000    0.0000 C   0  0  0  0  0  0  0  0  0  0  0  0
    1.0717    0.4125    0.0000 C   0  0  0  0  0  0  0  0  0  0  0  0
   -0.3572   -2.0625    0.0000 C   0  0  0  0  0  0  0  0  0  0  0  0
    0.3572   -2.4750    0.0000 C   0  0  0  0  0  0  0  0  0  0  0  0
    1.0717   -2.0625    0.0000 C   0  0  0  0  0  0  0  0  0  0  0  0
    1.0717    1.2375    0.0000 C   0  0  0  0  0  0  0  0  0  0  0  0
   -1.0717   -2.4750    0.0000 O   0  0  0  0  0  0  0  0  0  0  0  0
    2.5006   -1.2375    0.0000 O   0  0  0  0  0  0  0  0  0  0  0  0
   -2.5006   -0.0000    0.0000 O   0  0  0  0  0  0  0  0  0  0  0  0
   -1.0717    2.4750    0.0000 O   0  0  0  0  0  0  0  0  0  0  0  0
    1.7862   -2.4750    0.0000 O   0  0  0  0  0  0  0  0  0  0  0  0
  1  2  2  0      
  2  3  1  0      
  3  4  1  0      
  4  5  2  0      
  5  6  1  0      
  6  1  1  0      
  7  8  1  0      
  8  9  2  0      
  9  4  1  0      
  8 10  1  0      
 10 11  2  0      
 11 12  1  0      
 12 13  2  0      
 13  9  1  0      
  7 14  1  0      
 14 15  1  0      
 15 16  1  0      
 16 10  1  0      
 13 17  1  0      
 14 18  1  0      
 11 19  1  0      
  2 20  1  0      
  6 21  2  0      
 16 22  2  0      
M  END
