# Supplementary material for: Antibacterial Polyketides from the Marine Alga-Derived Endophitic Streptomyces sundarbansensis: A Study on Hydroxypyrone Tautomerism
Source: MDPI journal article supplement (doi:10.3390/md11010124), 2013-01-10
Supplement: s4 [file s4]

marinedrugs-11-00124-s002.mol
  corina  07071423073D 1   1.00000     0.00000 
CORINA 3.49 0023  12.04.2013
 21 23  0  0  0  0  0  0  0  0999 V2000
   -0.0163    1.3535    0.0095 C   0  0  0  0  0  0  0  0  0  0  0  0
    0.0021   -0.0041    0.0020 C   0  0  0  0  0  0  0  0  0  0  0  0
    1.1621   -0.6778   -0.0127 O   0  0  0  0  0  0  0  0  0  0  0  0
    2.3493   -0.0447   -0.0206 C   0  0  0  0  0  0  0  0  0  0  0  0
    2.4123    1.3174   -0.0139 C   0  0  0  0  0  0  0  0  0  0  0  0
    1.2084    2.0597    0.0016 C   0  0  0  0  0  0  0  0  0  0  0  0
    3.2315   -1.6080    2.3072 C   0  0  0  0  0  0  0  0  0  0  0  0
    4.0029   -1.5979    1.1392 C   0  0  0  0  0  0  0  0  0  0  0  0
    3.5933   -0.8308   -0.0362 C   0  0  0  0  0  0  0  0  0  0  0  0
    5.2052   -2.3421    1.0865 C   0  0  0  0  0  0  0  0  0  0  0  0
    5.9784   -2.3279   -0.0910 C   0  0  0  0  0  0  0  0  0  0  0  0
    5.5702   -1.5956   -1.1861 C   0  0  0  0  0  0  0  0  0  0  0  0
    4.3991   -0.8570   -1.1694 C   0  0  0  0  0  0  0  0  0  0  0  0
    3.6417   -2.3337    3.3865 C   0  0  0  0  0  0  0  0  0  0  0  0
    4.8213   -3.0695    3.3480 C   0  0  0  0  0  0  0  0  0  0  0  0
    5.6060   -3.0837    2.2154 C   0  0  0  0  0  0  0  0  0  0  0  0
    3.9942   -0.0730   -2.3909 C   0  0  0  0  0  0  0  0  0  0  0  0
    7.1319   -3.0390   -0.1481 O   0  0  0  0  0  0  0  0  0  0  0  0
   -1.1643   -0.6861    0.0099 O   0  0  0  0  0  0  0  0  0  0  0  0
    1.2265    3.2825    0.0076 O   0  0  0  0  0  0  0  0  0  0  0  0
    6.7555   -3.8056    2.1877 O   0  0  0  0  0  0  0  0  0  0  0  0
  1  2  2  0      
  2  3  1  0      
  3  4  1  0      
  4  5  2  0      
  5  6  1  0      
  6  1  1  0      
  7  8  1  0      
  8  9  2  0      
  9  4  1  0      
  8 10  1  0      
 10 11  2  0      
 11 12  1  0      
 12 13  2  0      
 13  9  1  0      
  7 14  2  0      
 14 15  1  0      
 15 16  2  0      
 16 10  1  0      
 13 17  1  0      
 11 18  1  0      
  2 19  1  0      
  6 20  2  0      
 16 21  1  0      
M  END
$$$$
