# Supplementary material for: Antibacterial Polyketides from the Marine Alga-Derived Endophitic Streptomyces sundarbansensis: A Study on Hydroxypyrone Tautomerism
Source: MDPI journal article supplement (doi:10.3390/md11010124), 2013-01-10
Supplement: s6 [file s6]

marinedrugs-11-00124-s003.mol
  corina  07071423093D 1   1.00000     0.00000 
CORINA 3.49 0023  12.04.2013
 22 24  0  0  0  0  0  0  0  0999 V2000
   -0.0164    1.3555    0.0095 C   0  0  0  0  0  0  0  0  0  0  0  0
    0.0021   -0.0041    0.0020 C   0  0  0  0  0  0  0  0  0  0  0  0
    1.1630   -0.6740   -0.0127 O   0  0  0  0  0  0  0  0  0  0  0  0
    2.3454   -0.0431   -0.0206 C   0  0  0  0  0  0  0  0  0  0  0  0
    2.4142    1.3002   -0.0140 C   0  0  0  0  0  0  0  0  0  0  0  0
    1.2097    2.0546    0.0015 C   0  0  0  0  0  0  0  0  0  0  0  0
    3.9882   -1.2322    1.3736 C   0  0  0  0  0  0  0  0  0  0  0  0
    3.6173   -0.8512   -0.0365 C   0  0  0  0  0  0  0  0  0  0  0  0
   -1.1632   -0.6876    0.0099 O   0  0  0  0  0  0  0  0  0  0  0  0
    1.2350    3.2765    0.0075 O   0  0  0  0  0  0  0  0  0  0  0  0
    4.8779   -0.4596    2.0896 C   0  0  0  0  0  0  0  0  0  0  0  0
    5.2188   -0.8104    3.3863 C   0  0  0  0  0  0  0  0  0  0  0  0
    4.6780   -1.9346    3.9780 C   0  0  0  0  0  0  0  0  0  0  0  0
    3.7829   -2.7287    3.2746 C   0  0  0  0  0  0  0  0  0  0  0  0
    3.4287   -2.3660    1.9648 C   0  0  0  0  0  0  0  0  0  0  0  0
    3.2632   -3.8372    3.8513 O   0  0  0  0  0  0  0  0  0  0  0  0
    2.0318   -4.3576    3.3513 C   0  0  0  0  0  0  0  0  0  0  0  0
    2.1432   -4.5587    1.8329 C   0  0  0  0  0  0  0  0  0  0  0  0
    2.4669   -3.2035    1.2266 C   0  0  0  0  0  0  0  0  0  0  0  0
    1.9621   -2.8319    0.1881 O   0  0  0  0  0  0  0  0  0  0  0  0
    1.7343   -5.6995    4.0234 C   0  0  0  0  0  0  0  0  0  0  0  0
    0.9755   -3.4377    3.6342 O   0  0  0  0  0  0  0  0  0  0  0  0
  1  2  2  0      
  2  3  1  0      
  3  4  1  0      
  4  5  2  0      
  5  6  1  0      
  6  1  1  0      
  7  8  1  0      
  8  4  1  0      
  2  9  1  0      
  6 10  2  0      
  7 11  1  0      
 11 12  2  0      
 12 13  1  0      
 13 14  2  0      
 14 15  1  0      
 15  7  2  0      
 14 16  1  0      
 16 17  1  0      
 17 18  1  0      
 18 19  1  0      
 19 15  1  0      
 19 20  2  0      
 17 21  1  0      
 17 22  1  0      
M  END
$$$$
