# Supplementary material for: Antibacterial Polyketides from the Marine Alga-Derived Endophitic Streptomyces sundarbansensis: A Study on Hydroxypyrone Tautomerism
Source: MDPI journal article supplement (doi:10.3390/md11010124), 2013-01-10
Supplement: s7 [file s7]

marinedrugs-11-00124-s003.mol
  ChemDraw06021422262D

 22 24  0  0  0  0  0  0  0  0999 V2000
   -2.1434    1.2375    0.0000 C   0  0  0  0  0  0  0  0  0  0  0  0
   -2.1434    0.4125    0.0000 C   0  0  0  0  0  0  0  0  0  0  0  0
   -1.4289    0.0000    0.0000 O   0  0  0  0  0  0  0  0  0  0  0  0
   -0.7145    0.4125    0.0000 C   0  0  0  0  0  0  0  0  0  0  0  0
   -0.7145    1.2375    0.0000 C   0  0  0  0  0  0  0  0  0  0  0  0
   -1.4289    1.6500    0.0000 C   0  0  0  0  0  0  0  0  0  0  0  0
    0.0000   -0.8250    0.0000 C   0  0  0  0  0  0  0  0  0  0  0  0
    0.0000    0.0000    0.0000 C   0  0  0  0  0  0  0  0  0  0  0  0
   -2.8579    0.0000    0.0000 O   0  0  0  0  0  0  0  0  0  0  0  0
   -1.4289    2.4750    0.0000 O   0  0  0  0  0  0  0  0  0  0  0  0
   -0.7145   -1.2375    0.0000 C   0  0  0  0  0  0  0  0  0  0  0  0
   -0.7145   -2.0625    0.0000 C   0  0  0  0  0  0  0  0  0  0  0  0
    0.0000   -2.4750    0.0000 C   0  0  0  0  0  0  0  0  0  0  0  0
    0.7145   -2.0625    0.0000 C   0  0  0  0  0  0  0  0  0  0  0  0
    0.7145   -1.2375    0.0000 C   0  0  0  0  0  0  0  0  0  0  0  0
    1.4289   -2.4750    0.0000 O   0  0  0  0  0  0  0  0  0  0  0  0
    2.1434   -2.0625    0.0000 C   0  0  0  0  0  0  0  0  0  0  0  0
    2.1434   -1.2375    0.0000 C   0  0  0  0  0  0  0  0  0  0  0  0
    1.4289   -0.8250    0.0000 C   0  0  0  0  0  0  0  0  0  0  0  0
    1.4289    0.0000    0.0000 O   0  0  0  0  0  0  0  0  0  0  0  0
    2.8579   -2.4750    0.0000 C   0  0  0  0  0  0  0  0  0  0  0  0
    2.8579   -1.6500    0.0000 O   0  0  0  0  0  0  0  0  0  0  0  0
  1  2  2  0      
  2  3  1  0      
  3  4  1  0      
  4  5  2  0      
  5  6  1  0      
  6  1  1  0      
  7  8  1  0      
  8  4  1  0      
  2  9  1  0      
  6 10  2  0      
  7 11  1  0      
 11 12  2  0      
 12 13  1  0      
 13 14  2  0      
 14 15  1  0      
 15  7  2  0      
 14 16  1  0      
 16 17  1  0      
 17 18  1  0      
 18 19  1  0      
 19 15  1  0      
 19 20  2  0      
 17 21  1  0      
 17 22  1  0      
M  END
