# Supplementary material for: Antibacterial Polyketides from the Marine Alga-Derived Endophitic Streptomyces sundarbansensis: A Study on Hydroxypyrone Tautomerism
Source: MDPI journal article supplement (doi:10.3390/md11010124), 2013-01-10
Supplement: s8 [file s8]

marinedrugs-11-00124-s004.mol
  corina  07071423093D 1   1.00000     0.00000 
CORINA 3.49 0023  12.04.2013
 21 23  0  0  0  0  0  0  0  0999 V2000
   -0.0164    1.3555    0.0095 C   0  0  0  0  0  0  0  0  0  0  0  0
    0.0021   -0.0041    0.0020 C   0  0  0  0  0  0  0  0  0  0  0  0
    1.1630   -0.6740   -0.0127 O   0  0  0  0  0  0  0  0  0  0  0  0
    2.3454   -0.0431   -0.0206 C   0  0  0  0  0  0  0  0  0  0  0  0
    2.4142    1.3002   -0.0140 C   0  0  0  0  0  0  0  0  0  0  0  0
    1.2097    2.0546    0.0015 C   0  0  0  0  0  0  0  0  0  0  0  0
    3.9882   -1.2322    1.3736 C   0  0  0  0  0  0  0  0  0  0  0  0
    3.6173   -0.8512   -0.0365 C   0  0  0  0  0  0  0  0  0  0  0  0
   -1.1632   -0.6876    0.0099 O   0  0  0  0  0  0  0  0  0  0  0  0
    1.2350    3.2765    0.0075 O   0  0  0  0  0  0  0  0  0  0  0  0
    4.8773   -0.4605    2.0898 C   0  0  0  0  0  0  0  0  0  0  0  0
    5.2200   -0.8103    3.3876 C   0  0  0  0  0  0  0  0  0  0  0  0
    4.6792   -1.9313    3.9810 C   0  0  0  0  0  0  0  0  0  0  0  0
    3.7804   -2.7226    3.2764 C   0  0  0  0  0  0  0  0  0  0  0  0
    3.4300   -2.3640    1.9644 C   0  0  0  0  0  0  0  0  0  0  0  0
    3.2377   -3.8236    3.8353 O   0  0  0  0  0  0  0  0  0  0  0  0
    2.3700   -4.6048    3.1834 C   0  0  0  0  0  0  0  0  0  0  0  0
    1.9699   -4.3579    1.9229 C   0  0  0  0  0  0  0  0  0  0  0  0
    2.4735   -3.2209    1.2372 C   0  0  0  0  0  0  0  0  0  0  0  0
    2.1330   -2.9655    0.0947 O   0  0  0  0  0  0  0  0  0  0  0  0
    1.8167   -5.8146    3.8913 C   0  0  0  0  0  0  0  0  0  0  0  0
  1  2  2  0      
  2  3  1  0      
  3  4  1  0      
  4  5  2  0      
  5  6  1  0      
  6  1  1  0      
  7  8  1  0      
  8  4  1  0      
  2  9  1  0      
  6 10  2  0      
  7 11  1  0      
 11 12  2  0      
 12 13  1  0      
 13 14  2  0      
 14 15  1  0      
 15  7  2  0      
 14 16  1  0      
 16 17  1  0      
 17 18  2  0      
 18 19  1  0      
 19 15  1  0      
 19 20  2  0      
 17 21  1  0      
M  END
$$$$
