# Supplementary material for: Antibacterial Polyketides from the Marine Alga-Derived Endophitic Streptomyces sundarbansensis: A Study on Hydroxypyrone Tautomerism
Source: MDPI journal article supplement (doi:10.3390/md11010124), 2013-01-10
Supplement: s10 [file s10]

marinedrugs-11-00124-s005.mol
  corina  07071423093D 1   1.00000     0.00000 
CORINA 3.49 0023  12.04.2013
 27 30  0  0  0  0  0  0  0  0999 V2000
   -0.0169    1.3942    0.0097 C   0  0  0  0  0  0  0  0  0  0  0  0
    0.0021   -0.0041    0.0020 C   0  0  0  0  0  0  0  0  0  0  0  0
    1.1725   -0.6663   -0.0123 O   0  0  0  0  0  0  0  0  0  0  0  0
    2.3467   -0.0091   -0.0199 C   0  0  0  0  0  0  0  0  0  0  0  0
    2.3866    1.3531   -0.0134 C   0  0  0  0  0  0  0  0  0  0  0  0
    1.1852    2.0845    0.0019 C   0  0  0  0  0  0  0  0  0  0  0  0
    3.1201   -1.4697    2.3144 C   0  0  0  0  0  0  0  0  0  0  0  0
    3.9985   -1.4926    1.0934 C   0  0  0  0  0  0  0  0  0  0  0  0
    3.6071   -0.7731   -0.0351 C   0  0  0  0  0  0  0  0  0  0  0  0
    5.1920   -2.2140    1.0636 C   0  0  0  0  0  0  0  0  0  0  0  0
    5.9968   -2.2101   -0.0908 C   0  0  0  0  0  0  0  0  0  0  0  0
    5.6046   -1.4933   -1.2090 C   0  0  0  0  0  0  0  0  0  0  0  0
    4.4146   -0.7755   -1.1906 C   0  0  0  0  0  0  0  0  0  0  0  0
    3.3745   -2.6851    3.2018 C   0  0  0  0  0  0  0  0  0  0  0  0
    4.8693   -2.7641    3.5388 C   0  0  0  0  0  0  0  0  0  0  0  0
    5.6146   -2.9906    2.2400 C   0  0  0  0  0  0  0  0  0  0  0  0
    3.9939   -0.0119   -2.3874 C   0  0  0  0  0  0  0  0  0  0  0  0
    1.2025    3.4388    0.0086 O   0  0  0  0  0  0  0  0  0  0  0  0
    7.1581   -2.9085   -0.1081 O   0  0  0  0  0  0  0  0  0  0  0  0
    2.6195   -2.5608    4.4087 O   0  0  0  0  0  0  0  0  0  0  0  0
   -1.0477   -0.6259    0.0087 O   0  0  0  0  0  0  0  0  0  0  0  0
    6.5285   -3.7854    2.1717 O   0  0  0  0  0  0  0  0  0  0  0  0
    4.8866    0.8593   -3.0120 C   0  0  0  0  0  0  0  0  0  0  0  0
    4.4886    1.5680   -4.1269 C   0  0  0  0  0  0  0  0  0  0  0  0
    3.2070    1.4159   -4.6256 C   0  0  0  0  0  0  0  0  0  0  0  0
    2.3169    0.5538   -4.0104 C   0  0  0  0  0  0  0  0  0  0  0  0
    2.7049   -0.1652   -2.8985 C   0  0  0  0  0  0  0  0  0  0  0  0
  1  2  1  0      
  2  3  1  0      
  3  4  1  0      
  4  5  2  0      
  5  6  1  0      
  6  1  2  0      
  7  8  1  0      
  8  9  2  0      
  9  4  1  0      
  8 10  1  0      
 10 11  2  0      
 11 12  1  0      
 12 13  2  0      
 13  9  1  0      
  7 14  1  0      
 14 15  1  0      
 15 16  1  0      
 16 10  1  0      
 13 17  1  0      
  6 18  1  0      
 11 19  1  0      
 14 20  1  0      
  2 21  2  0      
 16 22  2  0      
 17 23  2  0      
 23 24  1  0      
 24 25  2  0      
 25 26  1  0      
 26 27  2  0      
 27 17  1  0      
M  END
$$$$
