# Supplementary material for: Antibacterial Polyketides from the Marine Alga-Derived Endophitic Streptomyces sundarbansensis: A Study on Hydroxypyrone Tautomerism
Source: MDPI journal article supplement (doi:10.3390/md11010124), 2013-01-10
Supplement: s12 [file s12]

marinedrugs-11-00124-s006.mol
  corina  07071423093D 1   1.00000     0.00000 
CORINA 3.49 0023  12.04.2013
 26 29  0  0  0  0  0  0  0  0999 V2000
   -0.0169    1.3927    0.0097 C   0  0  0  0  0  0  0  0  0  0  0  0
    0.0021   -0.0041    0.0020 C   0  0  0  0  0  0  0  0  0  0  0  0
    1.1708   -0.6696   -0.0127 O   0  0  0  0  0  0  0  0  0  0  0  0
    2.3476   -0.0147   -0.0204 C   0  0  0  0  0  0  0  0  0  0  0  0
    2.3865    1.3612   -0.0130 C   0  0  0  0  0  0  0  0  0  0  0  0
    1.1842    2.0873    0.0020 C   0  0  0  0  0  0  0  0  0  0  0  0
    3.2544   -1.5604    2.3052 C   0  0  0  0  0  0  0  0  0  0  0  0
    4.0268   -1.5369    1.1376 C   0  0  0  0  0  0  0  0  0  0  0  0
    3.6024   -0.7765   -0.0365 C   0  0  0  0  0  0  0  0  0  0  0  0
    5.2421   -2.2599    1.0857 C   0  0  0  0  0  0  0  0  0  0  0  0
    6.0199   -2.2349   -0.0904 C   0  0  0  0  0  0  0  0  0  0  0  0
    5.6091   -1.5147   -1.1879 C   0  0  0  0  0  0  0  0  0  0  0  0
    4.4161   -0.7885   -1.1787 C   0  0  0  0  0  0  0  0  0  0  0  0
    3.6761   -2.2786    3.3853 C   0  0  0  0  0  0  0  0  0  0  0  0
    4.8679   -2.9942    3.3471 C   0  0  0  0  0  0  0  0  0  0  0  0
    5.6542   -2.9938    2.2150 C   0  0  0  0  0  0  0  0  0  0  0  0
    4.0085   -0.0261   -2.3815 C   0  0  0  0  0  0  0  0  0  0  0  0
    1.1972    3.4418    0.0091 O   0  0  0  0  0  0  0  0  0  0  0  0
    7.1849   -2.9280   -0.1399 O   0  0  0  0  0  0  0  0  0  0  0  0
   -1.0487   -0.6245    0.0091 O   0  0  0  0  0  0  0  0  0  0  0  0
    6.8162   -3.6955    2.1886 O   0  0  0  0  0  0  0  0  0  0  0  0
    4.9103    0.8391   -3.0009 C   0  0  0  0  0  0  0  0  0  0  0  0
    4.5249    1.5462   -4.1213 C   0  0  0  0  0  0  0  0  0  0  0  0
    3.2470    1.3984   -4.6304 C   0  0  0  0  0  0  0  0  0  0  0  0
    2.3479    0.5421   -4.0201 C   0  0  0  0  0  0  0  0  0  0  0  0
    2.7233   -0.1748   -2.9026 C   0  0  0  0  0  0  0  0  0  0  0  0
  1  2  1  0      
  2  3  1  0      
  3  4  1  0      
  4  5  2  0      
  5  6  1  0      
  6  1  2  0      
  7  8  1  0      
  8  9  2  0      
  9  4  1  0      
  8 10  1  0      
 10 11  2  0      
 11 12  1  0      
 12 13  2  0      
 13  9  1  0      
  7 14  2  0      
 14 15  1  0      
 15 16  2  0      
 16 10  1  0      
 13 17  1  0      
  6 18  1  0      
 11 19  1  0      
  2 20  2  0      
 16 21  1  0      
 17 22  2  0      
 22 23  1  0      
 23 24  2  0      
 24 25  1  0      
 25 26  2  0      
 26 17  1  0      
M  END
$$$$
