# Supplementary material for: Antibacterial Polyketides from the Marine Alga-Derived Endophitic Streptomyces sundarbansensis: A Study on Hydroxypyrone Tautomerism
Source: MDPI journal article supplement (doi:10.3390/md11010124), 2013-01-10
Supplement: s13 [file s13]

marinedrugs-11-00124-s006.mol
  ChemDraw06041414222D

 26 29  0  0  0  0  0  0  0  0999 V2000
   -1.7862    1.0312    0.0000 C   0  0  0  0  0  0  0  0  0  0  0  0
   -1.7862    0.2062    0.0000 C   0  0  0  0  0  0  0  0  0  0  0  0
   -1.0717   -0.2063    0.0000 O   0  0  0  0  0  0  0  0  0  0  0  0
   -0.3572    0.2062    0.0000 C   0  0  0  0  0  0  0  0  0  0  0  0
   -0.3572    1.0312    0.0000 C   0  0  0  0  0  0  0  0  0  0  0  0
   -1.0717    1.4437    0.0000 C   0  0  0  0  0  0  0  0  0  0  0  0
   -0.3572   -1.4438    0.0000 C   0  0  0  0  0  0  0  0  0  0  0  0
    0.3572   -1.0313    0.0000 C   0  0  0  0  0  0  0  0  0  0  0  0
    0.3572   -0.2063    0.0000 C   0  0  0  0  0  0  0  0  0  0  0  0
    1.0717   -1.4438    0.0000 C   0  0  0  0  0  0  0  0  0  0  0  0
    1.7862   -1.0313    0.0000 C   0  0  0  0  0  0  0  0  0  0  0  0
    1.7862   -0.2063    0.0000 C   0  0  0  0  0  0  0  0  0  0  0  0
    1.0717    0.2062    0.0000 C   0  0  0  0  0  0  0  0  0  0  0  0
   -0.3572   -2.2687    0.0000 C   0  0  0  0  0  0  0  0  0  0  0  0
    0.3572   -2.6812    0.0000 C   0  0  0  0  0  0  0  0  0  0  0  0
    1.0717   -2.2687    0.0000 C   0  0  0  0  0  0  0  0  0  0  0  0
    1.0717    1.0312    0.0000 C   0  0  0  0  0  0  0  0  0  0  0  0
   -1.0717    2.2687    0.0000 O   0  0  0  0  0  0  0  0  0  0  0  0
    2.5006   -1.4438    0.0000 O   0  0  0  0  0  0  0  0  0  0  0  0
   -2.5006   -0.2063    0.0000 O   0  0  0  0  0  0  0  0  0  0  0  0
    1.7862   -2.6812    0.0000 O   0  0  0  0  0  0  0  0  0  0  0  0
    1.7862    1.4437    0.0000 C   0  0  0  0  0  0  0  0  0  0  0  0
    1.7862    2.2687    0.0000 C   0  0  0  0  0  0  0  0  0  0  0  0
    1.0717    2.6812    0.0000 C   0  0  0  0  0  0  0  0  0  0  0  0
    0.3572    2.2687    0.0000 C   0  0  0  0  0  0  0  0  0  0  0  0
    0.3572    1.4437    0.0000 C   0  0  0  0  0  0  0  0  0  0  0  0
  1  2  1  0      
  2  3  1  0      
  3  4  1  0      
  4  5  2  0      
  5  6  1  0      
  6  1  2  0      
  7  8  1  0      
  8  9  2  0      
  9  4  1  0      
  8 10  1  0      
 10 11  2  0      
 11 12  1  0      
 12 13  2  0      
 13  9  1  0      
  7 14  2  0      
 14 15  1  0      
 15 16  2  0      
 16 10  1  0      
 13 17  1  0      
  6 18  1  0      
 11 19  1  0      
  2 20  2  0      
 16 21  1  0      
 17 22  2  0      
 22 23  1  0      
 23 24  2  0      
 24 25  1  0      
 25 26  2  0      
 26 17  1  0      
M  END
