# Supplementary material for: Antibacterial Polyketides from the Marine Alga-Derived Endophitic Streptomyces sundarbansensis: A Study on Hydroxypyrone Tautomerism
Source: MDPI journal article supplement (doi:10.3390/md11010124), 2013-01-10
Supplement: s14 [file s14]

marinedrugs-11-00124-s007.mol
  corina  07071423103D 1   1.00000     0.00000 
CORINA 3.49 0023  12.04.2013
 23 25  0  0  0  0  0  0  0  0999 V2000
   -0.0169    1.3961    0.0097 C   0  0  0  0  0  0  0  0  0  0  0  0
    0.0021   -0.0041    0.0020 C   0  0  0  0  0  0  0  0  0  0  0  0
    1.1735   -0.6630   -0.0123 O   0  0  0  0  0  0  0  0  0  0  0  0
    2.3431   -0.0074   -0.0199 C   0  0  0  0  0  0  0  0  0  0  0  0
    2.3876    1.3382   -0.0131 C   0  0  0  0  0  0  0  0  0  0  0  0
    1.1852    2.0799    0.0019 C   0  0  0  0  0  0  0  0  0  0  0  0
    4.8824   -0.3758    2.0907 C   0  0  0  0  0  0  0  0  0  0  0  0
    4.0085   -1.1645    1.3742 C   0  0  0  0  0  0  0  0  0  0  0  0
    3.6305   -0.7905   -0.0359 C   0  0  0  0  0  0  0  0  0  0  0  0
    3.4772   -2.3105    1.9626 C   0  0  0  0  0  0  0  0  0  0  0  0
    5.2316   -0.7190    3.3885 C   0  0  0  0  0  0  0  0  0  0  0  0
    4.7127   -1.8504    3.9816 C   0  0  0  0  0  0  0  0  0  0  0  0
    3.8299   -2.6592    3.2766 C   0  0  0  0  0  0  0  0  0  0  0  0
    1.2093    3.4335    0.0085 O   0  0  0  0  0  0  0  0  0  0  0  0
   -1.0468   -0.6272    0.0087 O   0  0  0  0  0  0  0  0  0  0  0  0
    3.3094   -3.7710    3.8351 O   0  0  0  0  0  0  0  0  0  0  0  0
    2.4582   -4.5696    3.1827 C   0  0  0  0  0  0  0  0  0  0  0  0
    2.0538   -4.3307    1.9220 C   0  0  0  0  0  0  0  0  0  0  0  0
    2.5375   -3.1857    1.2353 C   0  0  0  0  0  0  0  0  0  0  0  0
    1.9292   -5.7906    3.8901 C   0  0  0  0  0  0  0  0  0  0  0  0
    2.9228   -6.9430    3.7306 C   0  0  0  0  0  0  0  0  0  0  0  0
    2.3858   -8.1826    4.4488 C   0  0  0  0  0  0  0  0  0  0  0  0
    2.1930   -2.9375    0.0925 O   0  0  0  0  0  0  0  0  0  0  0  0
  1  2  1  0      
  2  3  1  0      
  3  4  1  0      
  4  5  2  0      
  5  6  1  0      
  6  1  2  0      
  7  8  1  0      
  8  9  1  0      
  9  4  1  0      
  8 10  2  0      
  7 11  2  0      
 11 12  1  0      
 12 13  2  0      
 13 10  1  0      
  6 14  1  0      
  2 15  2  0      
 13 16  1  0      
 16 17  1  0      
 17 18  2  0      
 18 19  1  0      
 19 10  1  0      
 17 20  1  0      
 20 21  1  0      
 21 22  1  0      
 19 23  2  0      
M  END
$$$$
