# Supplementary material for: Antibacterial Polyketides from the Marine Alga-Derived Endophitic Streptomyces sundarbansensis: A Study on Hydroxypyrone Tautomerism
Source: MDPI journal article supplement (doi:10.3390/md11010124), 2013-01-10
Supplement: s15 [file s15]

marinedrugs-11-00124-s007.mol
  ChemDraw06021422302D

 23 25  0  0  0  0  0  0  0  0999 V2000
   -2.8579    1.2375    0.0000 C   0  0  0  0  0  0  0  0  0  0  0  0
   -2.8579    0.4125    0.0000 C   0  0  0  0  0  0  0  0  0  0  0  0
   -2.1434   -0.0000    0.0000 O   0  0  0  0  0  0  0  0  0  0  0  0
   -1.4289    0.4125    0.0000 C   0  0  0  0  0  0  0  0  0  0  0  0
   -1.4289    1.2375    0.0000 C   0  0  0  0  0  0  0  0  0  0  0  0
   -2.1434    1.6500    0.0000 C   0  0  0  0  0  0  0  0  0  0  0  0
   -1.4289   -1.2375    0.0000 C   0  0  0  0  0  0  0  0  0  0  0  0
   -0.7145   -0.8250    0.0000 C   0  0  0  0  0  0  0  0  0  0  0  0
   -0.7145   -0.0000    0.0000 C   0  0  0  0  0  0  0  0  0  0  0  0
    0.0000   -1.2375    0.0000 C   0  0  0  0  0  0  0  0  0  0  0  0
   -1.4289   -2.0625    0.0000 C   0  0  0  0  0  0  0  0  0  0  0  0
   -0.7145   -2.4750    0.0000 C   0  0  0  0  0  0  0  0  0  0  0  0
    0.0000   -2.0625    0.0000 C   0  0  0  0  0  0  0  0  0  0  0  0
   -2.1434    2.4750    0.0000 O   0  0  0  0  0  0  0  0  0  0  0  0
   -3.5724   -0.0000    0.0000 O   0  0  0  0  0  0  0  0  0  0  0  0
    0.7145   -2.4750    0.0000 O   0  0  0  0  0  0  0  0  0  0  0  0
    1.4289   -2.0625    0.0000 C   0  0  0  0  0  0  0  0  0  0  0  0
    1.4289   -1.2375    0.0000 C   0  0  0  0  0  0  0  0  0  0  0  0
    0.7145   -0.8250    0.0000 C   0  0  0  0  0  0  0  0  0  0  0  0
    2.1434   -2.4750    0.0000 C   0  0  0  0  0  0  0  0  0  0  0  0
    2.8579   -2.0625    0.0000 C   0  0  0  0  0  0  0  0  0  0  0  0
    3.5724   -2.4750    0.0000 C   0  0  0  0  0  0  0  0  0  0  0  0
    0.7145    0.0000    0.0000 O   0  0  0  0  0  0  0  0  0  0  0  0
  1  2  1  0      
  2  3  1  0      
  3  4  1  0      
  4  5  2  0      
  5  6  1  0      
  6  1  2  0      
  7  8  1  0      
  8  9  1  0      
  9  4  1  0      
  8 10  2  0      
  7 11  2  0      
 11 12  1  0      
 12 13  2  0      
 13 10  1  0      
  6 14  1  0      
  2 15  2  0      
 13 16  1  0      
 16 17  1  0      
 17 18  2  0      
 18 19  1  0      
 19 10  1  0      
 17 20  1  0      
 20 21  1  0      
 21 22  1  0      
 19 23  2  0      
M  END
