# Supplementary material for: Antibacterial Polyketides from the Marine Alga-Derived Endophitic Streptomyces sundarbansensis: A Study on Hydroxypyrone Tautomerism
Source: MDPI journal article supplement (doi:10.3390/md11010124), 2013-01-10
Supplement: s16 [file s16]

marinedrugs-11-00124-s008.mol
  corina  07071423103D 1   1.00000     0.00000 
CORINA 3.49 0023  12.04.2013
 21 22  0  0  0  0  0  0  0  0999 V2000
   -0.0187    1.5258    0.0104 C   0  0  0  0  0  0  0  0  0  0  0  0
    0.4161   -2.6124    0.2283 O   0  0  0  0  0  0  0  0  0  0  0  0
    0.8700   -2.0108    1.1719 C   0  0  0  0  0  0  0  0  0  0  0  0
    0.7421   -0.5109    1.2415 C   0  0  0  0  0  0  0  0  0  0  0  0
    0.0021   -0.0041    0.0020 C   0  0  0  0  0  0  0  0  0  0  0  0
    0.5709   -5.0475    2.4864 C   0  0  0  0  0  0  0  0  0  0  0  0
    1.5571   -4.2350    1.9703 C   0  0  0  0  0  0  0  0  0  0  0  0
    1.5643   -2.7601    2.2799 C   0  0  0  0  0  0  0  0  0  0  0  0
    2.5477   -4.7868    1.1605 C   0  0  0  0  0  0  0  0  0  0  0  0
    0.5632   -6.4053    2.2027 C   0  0  0  0  0  0  0  0  0  0  0  0
    1.5380   -6.9630    1.4028 C   0  0  0  0  0  0  0  0  0  0  0  0
    2.5412   -6.1615    0.8723 C   0  0  0  0  0  0  0  0  0  0  0  0
   -1.3386   -0.4987    0.0122 O   0  0  0  0  0  0  0  0  0  0  0  0
    3.5056   -6.6839    0.0876 O   0  0  0  0  0  0  0  0  0  0  0  0
    4.4843   -5.9391   -0.4372 C   0  0  0  0  0  0  0  0  0  0  0  0
    4.5866   -4.6144   -0.2260 C   0  0  0  0  0  0  0  0  0  0  0  0
    3.6237   -3.9570    0.5846 C   0  0  0  0  0  0  0  0  0  0  0  0
    5.5179   -6.6129   -1.3025 C   0  0  0  0  0  0  0  0  0  0  0  0
    6.6204   -7.1984   -0.4178 C   0  0  0  0  0  0  0  0  0  0  0  0
    7.6698   -7.8825   -1.2963 C   0  0  0  0  0  0  0  0  0  0  0  0
    3.6847   -2.7581    0.7978 O   0  0  0  0  0  0  0  0  0  0  0  0
  2  3  2  0      
  3  4  1  0      
  4  5  1  0      
  5  1  1  0      
  6  7  1  0      
  7  8  1  0      
  8  3  1  0      
  7  9  2  0      
  6 10  2  0      
 10 11  1  0      
 11 12  2  0      
 12  9  1  0      
  5 13  1  0      
 12 14  1  0      
 14 15  1  0      
 15 16  2  0      
 16 17  1  0      
 17  9  1  0      
 15 18  1  0      
 18 19  1  0      
 19 20  1  0      
 17 21  2  0      
M  END
$$$$
