# Supplementary material for: Antibacterial Polyketides from the Marine Alga-Derived Endophitic Streptomyces sundarbansensis: A Study on Hydroxypyrone Tautomerism
Source: MDPI journal article supplement (doi:10.3390/md11010124), 2013-01-10
Supplement: s17 [file s17]

marinedrugs-11-00124-s008.mol
  ChemDraw06021422282D

 21 22  0  0  0  0  0  0  0  0999 V2000
   -3.2151    1.2375    0.0000 C   0  0  0  0  0  0  0  0  0  0  0  0
   -2.5006   -0.0000    0.0000 O   0  0  0  0  0  0  0  0  0  0  0  0
   -1.7862    0.4125    0.0000 C   0  0  0  0  0  0  0  0  0  0  0  0
   -1.7862    1.2375    0.0000 C   0  0  0  0  0  0  0  0  0  0  0  0
   -2.5006    1.6500    0.0000 C   0  0  0  0  0  0  0  0  0  0  0  0
   -1.7862   -1.2375    0.0000 C   0  0  0  0  0  0  0  0  0  0  0  0
   -1.0717   -0.8250    0.0000 C   0  0  0  0  0  0  0  0  0  0  0  0
   -1.0717   -0.0000    0.0000 C   0  0  0  0  0  0  0  0  0  0  0  0
   -0.3572   -1.2375    0.0000 C   0  0  0  0  0  0  0  0  0  0  0  0
   -1.7862   -2.0625    0.0000 C   0  0  0  0  0  0  0  0  0  0  0  0
   -1.0717   -2.4750    0.0000 C   0  0  0  0  0  0  0  0  0  0  0  0
   -0.3572   -2.0625    0.0000 C   0  0  0  0  0  0  0  0  0  0  0  0
   -2.5006    2.4750    0.0000 O   0  0  0  0  0  0  0  0  0  0  0  0
    0.3572   -2.4750    0.0000 O   0  0  0  0  0  0  0  0  0  0  0  0
    1.0717   -2.0625    0.0000 C   0  0  0  0  0  0  0  0  0  0  0  0
    1.0717   -1.2375    0.0000 C   0  0  0  0  0  0  0  0  0  0  0  0
    0.3572   -0.8250    0.0000 C   0  0  0  0  0  0  0  0  0  0  0  0
    1.7862   -2.4750    0.0000 C   0  0  0  0  0  0  0  0  0  0  0  0
    2.5006   -2.0625    0.0000 C   0  0  0  0  0  0  0  0  0  0  0  0
    3.2151   -2.4750    0.0000 C   0  0  0  0  0  0  0  0  0  0  0  0
    0.3572    0.0000    0.0000 O   0  0  0  0  0  0  0  0  0  0  0  0
  2  3  2  0      
  3  4  1  0      
  4  5  1  0      
  5  1  1  0      
  6  7  1  0      
  7  8  1  0      
  8  3  1  0      
  7  9  2  0      
  6 10  2  0      
 10 11  1  0      
 11 12  2  0      
 12  9  1  0      
  5 13  1  0      
 12 14  1  0      
 14 15  1  0      
 15 16  2  0      
 16 17  1  0      
 17  9  1  0      
 15 18  1  0      
 18 19  1  0      
 19 20  1  0      
 17 21  2  0      
M  END
