# Supplementary material for: Antibacterial Polyketides from the Marine Alga-Derived Endophitic Streptomyces sundarbansensis: A Study on Hydroxypyrone Tautomerism
Source: MDPI journal article supplement (doi:10.3390/md11010124), 2013-01-10
Supplement: s18 [file s18]

marinedrugs-11-00124-s009.mol
  corina  07071423103D 1   1.00000     0.00000 
CORINA 3.49 0023  12.04.2013
 18 19  0  0  0  0  0  0  0  0999 V2000
   -0.0167    1.3829    0.0096 C   0  0  0  0  0  0  0  0  0  0  0  0
    0.0021   -0.0041    0.0020 C   0  0  0  0  0  0  0  0  0  0  0  0
    1.1969   -0.6921   -0.0126 C   0  0  0  0  0  0  0  0  0  0  0  0
    2.3981    0.0060   -0.0203 C   0  0  0  0  0  0  0  0  0  0  0  0
    2.3775    1.4104   -0.0130 C   0  0  0  0  0  0  0  0  0  0  0  0
    1.1635    2.0942    0.0022 C   0  0  0  0  0  0  0  0  0  0  0  0
    3.5795   -0.6445   -0.0341 O   0  0  0  0  0  0  0  0  0  0  0  0
    4.7518   -0.0012   -0.0414 C   0  0  0  0  0  0  0  0  0  0  0  0
    4.8481    1.3406   -0.0355 C   0  0  0  0  0  0  0  0  0  0  0  0
    3.6668    2.1285   -0.0214 C   0  0  0  0  0  0  0  0  0  0  0  0
    1.1414    3.6011    0.0095 C   0  0  0  0  0  0  0  0  0  0  0  0
    1.2438    4.1118   -1.4046 C   0  0  0  0  0  0  0  0  0  0  0  0
    1.2434    5.4328   -1.6427 O   0  0  0  0  0  0  0  0  0  0  0  0
    1.3263    3.3322   -2.3240 O   0  0  0  0  0  0  0  0  0  0  0  0
    3.7156    3.3467   -0.0157 O   0  0  0  0  0  0  0  0  0  0  0  0
    6.0202   -0.8148   -0.0563 C   0  0  0  0  0  0  0  0  0  0  0  0
    6.3942   -1.2027    1.3757 C   0  0  0  0  0  0  0  0  0  0  0  0
    7.6819   -2.0287    1.3606 C   0  0  0  0  0  0  0  0  0  0  0  0
  1  2  2  0      
  2  3  1  0      
  3  4  2  0      
  4  5  1  0      
  5  6  2  0      
  6  1  1  0      
  4  7  1  0      
  7  8  1  0      
  8  9  2  0      
  9 10  1  0      
 10  5  1  0      
  6 11  1  0      
 11 12  1  0      
 12 13  1  0      
 12 14  2  0      
 10 15  2  0      
  8 16  1  0      
 16 17  1  0      
 17 18  1  0      
M  STY  1   1 SUP
M  SLB  1   1   1
M  SAL   1  3  16  17  18
M  SBL   1  1  17
M  SMT   1 CH2CH2CH3
M  SBV   1 17   -7.7409    4.5581
M  END
$$$$
