# Supplementary material for: Antibacterial Polyketides from the Marine Alga-Derived Endophitic Streptomyces sundarbansensis: A Study on Hydroxypyrone Tautomerism
Source: MDPI journal article supplement (doi:10.3390/md11010124), 2013-01-10
Supplement: s19 [file s19]

marinedrugs-11-00124-s009.mol
  ChemDraw06041414232D

 18 19  0  0  0  0  0  0  0  0999 V2000
   -1.9645   -0.3094    0.0000 C   0  0  0  0  0  0  0  0  0  0  0  0
   -1.9645   -1.1344    0.0000 C   0  0  0  0  0  0  0  0  0  0  0  0
   -1.2500   -1.5469    0.0000 C   0  0  0  0  0  0  0  0  0  0  0  0
   -0.5355   -1.1344    0.0000 C   0  0  0  0  0  0  0  0  0  0  0  0
   -0.5355   -0.3094    0.0000 C   0  0  0  0  0  0  0  0  0  0  0  0
   -1.2500    0.1031    0.0000 C   0  0  0  0  0  0  0  0  0  0  0  0
    0.1789   -1.5469    0.0000 O   0  0  0  0  0  0  0  0  0  0  0  0
    0.8934   -1.1344    0.0000 C   0  0  0  0  0  0  0  0  0  0  0  0
    0.8934   -0.3094    0.0000 C   0  0  0  0  0  0  0  0  0  0  0  0
    0.1789    0.1031    0.0000 C   0  0  0  0  0  0  0  0  0  0  0  0
   -1.2500    0.9281    0.0000 C   0  0  0  0  0  0  0  0  0  0  0  0
   -1.9645    1.3406    0.0000 C   0  0  0  0  0  0  0  0  0  0  0  0
   -2.6789    0.9281    0.0000 O   0  0  0  0  0  0  0  0  0  0  0  0
   -1.9645    2.1656    0.0000 O   0  0  0  0  0  0  0  0  0  0  0  0
    0.1789    0.9281    0.0000 O   0  0  0  0  0  0  0  0  0  0  0  0
    1.2500   -1.7531    0.0000 C   0  0  0  0  0  0  0  0  0  0  0  0
    1.9645   -2.1656    0.0000 C   0  0  0  0  0  0  0  0  0  0  0  0
    2.6789   -1.7531    0.0000 C   0  0  0  0  0  0  0  0  0  0  0  0
  1  2  2  0      
  2  3  1  0      
  3  4  2  0      
  4  5  1  0      
  5  6  2  0      
  6  1  1  0      
  4  7  1  0      
  7  8  1  0      
  8  9  2  0      
  9 10  1  0      
 10  5  1  0      
  6 11  1  0      
 11 12  1  0      
 12 13  1  0      
 12 14  2  0      
 10 15  2  0      
  8 16  1  0      
 16 17  1  0      
 17 18  1  0      
M  STY  1   1 SUP
M  SLB  1   1   1
M  SAL   1  3  16  17  18
M  SBL   1  1  17
M  SMT   1 CH2CH2CH3
M  SBV   1 17   -7.7409    4.5581
M  END
