# Supplementary material for: Antibacterial Polyketides from the Marine Alga-Derived Endophitic Streptomyces sundarbansensis: A Study on Hydroxypyrone Tautomerism
Source: MDPI journal article supplement (doi:10.3390/md11010124), 2013-01-10
Supplement: s20 [file s20]

marinedrugs-11-00124-s010.mol
  corina  07071423103D 1   1.00000     0.00000 
CORINA 3.49 0023  12.04.2013
 24 26  0  0  0  0  0  0  0  0999 V2000
   -0.0167    1.3816    0.0096 C   0  0  0  0  0  0  0  0  0  0  0  0
    0.0021   -0.0041    0.0020 C   0  0  0  0  0  0  0  0  0  0  0  0
    1.1986   -0.6930   -0.0093 C   0  0  0  0  0  0  0  0  0  0  0  0
    2.4008    0.0007   -0.0132 C   0  0  0  0  0  0  0  0  0  0  0  0
    2.3809    1.4050   -0.0123 C   0  0  0  0  0  0  0  0  0  0  0  0
    1.1655    2.0911    0.0022 C   0  0  0  0  0  0  0  0  0  0  0  0
    3.5728   -0.6758   -0.0114 O   0  0  0  0  0  0  0  0  0  0  0  0
    4.7452   -0.0184   -0.4920 C   0  0  0  0  0  0  0  0  0  0  0  0
    4.9119    1.3228    0.2371 C   0  0  0  0  0  0  0  0  0  0  0  0
    3.6592    2.1379   -0.0314 C   0  0  0  0  0  0  0  0  0  0  0  0
    1.1455    3.5979    0.0101 C   0  0  0  0  0  0  0  0  0  0  0  0
    1.2499    4.1091   -1.4037 C   0  0  0  0  0  0  0  0  0  0  0  0
    2.4580    4.2522   -1.9661 O   0  0  0  0  0  0  0  0  0  0  0  0
    3.7082    3.3299   -0.2507 O   0  0  0  0  0  0  0  0  0  0  0  0
    5.9685   -0.8985   -0.2277 C   0  0  0  0  0  0  0  0  0  0  0  0
    0.1290    4.4095   -2.0837 C   0  0  0  0  0  0  0  0  0  0  0  0
    0.2365    4.8906   -3.4169 C   0  0  0  0  0  0  0  0  0  0  0  0
    1.5255    5.0334   -3.9737 C   0  0  0  0  0  0  0  0  0  0  0  0
    2.6076    4.7021   -3.2198 C   0  0  0  0  0  0  0  0  0  0  0  0
    3.8481    4.8332   -3.7386 O   0  0  0  0  0  0  0  0  0  0  0  0
   -0.7610    5.1729   -4.0642 O   0  0  0  0  0  0  0  0  0  0  0  0
    5.8007   -2.2358   -0.9520 C   0  0  0  0  0  0  0  0  0  0  0  0
    7.0240   -3.1159   -0.6878 C   0  0  0  0  0  0  0  0  0  0  0  0
    4.6194    0.2146   -1.8962 O   0  0  0  0  0  0  0  0  0  0  0  0
  1  2  2  0      
  2  3  1  0      
  3  4  2  0      
  4  5  1  0      
  5  6  2  0      
  6  1  1  0      
  4  7  1  0      
  7  8  1  0      
  8  9  1  0      
  9 10  1  0      
 10  5  1  0      
  6 11  1  0      
 11 12  1  0      
 12 13  1  0      
 10 14  2  0      
  8 15  1  0      
 12 16  2  0      
 16 17  1  0      
 17 18  1  0      
 18 19  2  0      
 19 13  1  0      
 19 20  1  0      
 17 21  2  0      
 15 22  1  0      
 22 23  1  0      
  8 24  1  0      
M  END
$$$$
