# Supplementary material for: Antibacterial Polyketides from the Marine Alga-Derived Endophitic Streptomyces sundarbansensis: A Study on Hydroxypyrone Tautomerism
Source: MDPI journal article supplement (doi:10.3390/md11010124), 2013-01-10
Supplement: s21 [file s21]

marinedrugs-11-00124-s010.mol
  ChemDraw06021422282D

 24 26  0  0  0  0  0  0  0  0999 V2000
   -1.4289   -1.2375    0.0000 C   0  0  0  0  0  0  0  0  0  0  0  0
   -1.4289   -2.0625    0.0000 C   0  0  0  0  0  0  0  0  0  0  0  0
   -0.7145   -2.4750    0.0000 C   0  0  0  0  0  0  0  0  0  0  0  0
    0.0000   -2.0625    0.0000 C   0  0  0  0  0  0  0  0  0  0  0  0
    0.0000   -1.2375    0.0000 C   0  0  0  0  0  0  0  0  0  0  0  0
   -0.7145   -0.8250    0.0000 C   0  0  0  0  0  0  0  0  0  0  0  0
    0.7145   -2.4750    0.0000 O   0  0  0  0  0  0  0  0  0  0  0  0
    1.4289   -2.0625    0.0000 C   0  0  0  0  0  0  0  0  0  0  0  0
    1.4289   -1.2375    0.0000 C   0  0  0  0  0  0  0  0  0  0  0  0
    0.7145   -0.8250    0.0000 C   0  0  0  0  0  0  0  0  0  0  0  0
   -0.7145    0.0000    0.0000 C   0  0  0  0  0  0  0  0  0  0  0  0
   -1.4289    0.4125    0.0000 C   0  0  0  0  0  0  0  0  0  0  0  0
   -2.1434    0.0000    0.0000 O   0  0  0  0  0  0  0  0  0  0  0  0
    0.7145    0.0000    0.0000 O   0  0  0  0  0  0  0  0  0  0  0  0
    2.1434   -2.4750    0.0000 C   0  0  0  0  0  0  0  0  0  0  0  0
   -1.4289    1.2375    0.0000 C   0  0  0  0  0  0  0  0  0  0  0  0
   -2.1434    1.6500    0.0000 C   0  0  0  0  0  0  0  0  0  0  0  0
   -2.8579    1.2375    0.0000 C   0  0  0  0  0  0  0  0  0  0  0  0
   -2.8579    0.4125    0.0000 C   0  0  0  0  0  0  0  0  0  0  0  0
   -3.5724    0.0000    0.0000 O   0  0  0  0  0  0  0  0  0  0  0  0
   -2.1434    2.4750    0.0000 O   0  0  0  0  0  0  0  0  0  0  0  0
    2.8579   -2.0625    0.0000 C   0  0  0  0  0  0  0  0  0  0  0  0
    3.5724   -2.4750    0.0000 C   0  0  0  0  0  0  0  0  0  0  0  0
    2.1434   -1.6500    0.0000 O   0  0  0  0  0  0  0  0  0  0  0  0
  1  2  2  0      
  2  3  1  0      
  3  4  2  0      
  4  5  1  0      
  5  6  2  0      
  6  1  1  0      
  4  7  1  0      
  7  8  1  0      
  8  9  1  0      
  9 10  1  0      
 10  5  1  0      
  6 11  1  0      
 11 12  1  0      
 12 13  1  0      
 10 14  2  0      
  8 15  1  0      
 12 16  2  0      
 16 17  1  0      
 17 18  1  0      
 18 19  2  0      
 19 13  1  0      
 19 20  1  0      
 17 21  2  0      
 15 22  1  0      
 22 23  1  0      
  8 24  1  0      
M  END
