# Supplementary material for: Antibacterial Polyketides from the Marine Alga-Derived Endophitic Streptomyces sundarbansensis: A Study on Hydroxypyrone Tautomerism
Source: MDPI journal article supplement (doi:10.3390/md11010124), 2013-01-10
Supplement: s23 [file s23]

marinedrugs-11-00124-s011.mol
  ChemDraw06021422282D

 29 31  0  0  0  0  0  0  0  0999 V2000
   -1.4286   -1.2375    0.0000 C   0  0  0  0  0  0  0  0  0  0  0  0
   -1.4286   -2.0625    0.0000 C   0  0  0  0  0  0  0  0  0  0  0  0
   -0.7141   -2.4750    0.0000 C   0  0  0  0  0  0  0  0  0  0  0  0
    0.0004   -2.0625    0.0000 C   0  0  0  0  0  0  0  0  0  0  0  0
    0.0004   -1.2375    0.0000 C   0  0  0  0  0  0  0  0  0  0  0  0
   -0.7141   -0.8250    0.0000 C   0  0  0  0  0  0  0  0  0  0  0  0
    0.7148   -2.4750    0.0000 O   0  0  0  0  0  0  0  0  0  0  0  0
    1.4293   -2.0625    0.0000 C   0  0  0  0  0  0  0  0  0  0  0  0
    1.4293   -1.2375    0.0000 C   0  0  0  0  0  0  0  0  0  0  0  0
    0.7148   -0.8250    0.0000 C   0  0  0  0  0  0  0  0  0  0  0  0
   -0.7141    0.0000    0.0000 C   0  0  0  0  0  0  0  0  0  0  0  0
   -1.4286    0.4125    0.0000 C   0  0  0  0  0  0  0  0  0  0  0  0
   -2.1430    0.0000    0.0000 O   0  0  0  0  0  0  0  0  0  0  0  0
    0.7148    0.0000    0.0000 O   0  0  0  0  0  0  0  0  0  0  0  0
    2.1438   -2.4750    0.0000 C   0  0  0  0  0  0  0  0  0  0  0  0
   -1.4286    1.2375    0.0000 C   0  0  0  0  0  0  0  0  0  0  0  0
   -2.1430    1.6500    0.0000 C   0  0  0  0  0  0  0  0  0  0  0  0
   -2.8575    1.2375    0.0000 C   0  0  0  0  0  0  0  0  0  0  0  0
   -2.8575    0.4125    0.0000 C   0  0  0  0  0  0  0  0  0  0  0  0
   -2.1430    2.4750    0.0000 O   0  0  0  0  0  0  0  0  0  0  0  0
    2.8583   -2.0625    0.0000 C   0  0  0  0  0  0  0  0  0  0  0  0
    3.5727   -2.4750    0.0000 C   0  0  0  0  0  0  0  0  0  0  0  0
   -3.5720    1.6500    0.0000 H   1  0  0  0  0  0  0  0  0  0  0  0
    1.8418   -0.5230    0.0000 H   1  0  0  0  0  0  0  0  0  0  0  0
    2.1438   -0.8250    0.0000 H   1  0  0  0  0  0  0  0  0  0  0  0
   -3.5727    0.4125    0.0000 O   0  0  0  0  0  0  0  0  0  0  0  0
   -2.8583    0.0000    0.0000 H   1  0  0  0  0  0  0  0  0  0  0  0
    2.1431   -1.6500    0.0000 O   0  0  0  0  0  0  0  0  0  0  0  0
    2.8576   -2.0625    0.0000 H   1  0  0  0  0  0  0  0  0  0  0  0
  1  2  2  0      
  2  3  1  0      
  3  4  2  0      
  4  5  1  0      
  5  6  2  0      
  6  1  1  0      
  4  7  1  0      
  7  8  1  0      
  8  9  1  0      
  9 10  1  0      
 10  5  1  0      
  6 11  1  0      
 11 12  1  0      
 12 13  1  0      
 10 14  2  0      
  8 15  1  0      
 12 16  2  0      
 16 17  1  0      
 17 18  1  0      
 18 19  2  0      
 19 13  1  0      
 17 20  2  0      
 15 21  1  0      
 21 22  1  0      
 18 23  1  0      
  9 24  1  0      
  9 25  1  0      
 19 26  1  0      
 26 27  1  0      
  8 28  1  0      
 28 29  1  0      
M  ISO  5  23   2  24   2  25   2  27   2  29   2
M  STY  1   1 SUP
M  SLB  1   1   1
M  SAL   1  2  26  27
M  SBL   1  1  28
M  SMT   1 OD
M  SBV   1 28   -8.2356    5.8781
M  STY  1   2 SUP
M  SLB  1   2   2
M  SAL   2  2  28  29
M  SBL   2  1  30
M  SMT   2 OD
M  SBV   2 30   -6.8065    6.2906
M  END
